# Supplementary material for: Shape and interactions of the synthetic repellent DEET
Source: Royal Society of Chemistry journal article supplement (doi:10.1039/d4cp02315c), 2024-01-01
Supplement: d4cp02315c1.pdf [file d4cp02315c1.pdf]

Supplementary information for:

## Shape and Interactions of the Synthetic Repellent DEET

Otger Crehuet,<sup>a,b</sup> Andrea Vázquez,<sup>a,b</sup> Pablo Pinacho,<sup>a,b</sup> Aran Insausti,<sup>a,b</sup> Elena R. Alonso,<sup>a,b,c</sup> Francisco J. Basterretxea<sup>a</sup> and Emilio Cocinero\*<sup>a,b</sup>

*N,N*-diethyl-3-methylbenzamide (DEET) is the most widely used insect repellent, exhibiting high efficiency against a wide variety of species. In this work, a comprehensive isolated-molecule investigation of DEET was conducted using chirp-excitation Fourier transform microwave (CP-FTMW) spectroscopy within the frequency range of 7 - 14 GHz. Four out of the eight theoretically predicted conformers were detected and grouped in pairs based on their rotational constants and planar moments of inertia. We also studied the non-covalent interactions of DEET by characterizing the attractive and repulsive forces, which could explain the energetic ordering of the four conformers. In addition, DEET has a methyl top bound to the benzyl ring which is predicted to rotate almost freely with respect to the molecular framework.

### List of figures:

**Figure S1.** Theoretically predicted 8 chiral pairs of conformations of DEET (B3LYP-GD3BJ/def2-TZVP)

**Figure S2.** Additional views of the predicted conformations of DEET (B3LYP-GD3BJ/def2-TZVP) showing the conversion pathways.

**Figure S3.** Potential energy surface scans of the  $\delta$  (C6-C1-C8-O1) dihedral angle.

**Figure S4.** Potential energy surface scan of the  $\theta$  (C8-N1-C10-C12) dihedral angle.

**Figure S5.** Potential energy surface scan of the  $\phi$  (C8-N1-C9-C11) dihedral angle.

**Figure S6.** Full frequency range of the recorded rotational spectrum of DEET.

**Figure S7.** Excerpt of the DEET spectrum showing the hyperfine structure of the lines.

### List of tables:

**Table S1.** Theoretical rotational parameters at B3LYP/def2-TZVP with the D3BJ version of Grimme's dispersion for DEET conformers.

**Table S2.** Relative energies and populations for the eight conformers of DEET.

**Table S3.** Observed transition frequencies for *+sc/-ac/-sc* 1.

**Table S4.** Observed transition frequencies for *+ac/+ac/+sc* 2.

**Table S5.** Observed transition frequencies for *+sc/-ac/+sc* 3.

**Table S6.** Observed transition frequencies for *+ac/+ac/-sc* 4.

---

<sup>a</sup>Departamento de Química Física, Facultad de Ciencia y Tecnología, Universidad del País Vasco (UPV/EHU), Leioa, 48940, Spain.

E-mail: [emiliojose.cocinero@ehu.es](mailto:emiliojose.cocinero@ehu.es);

Web: <https://grupodeespectroscopia.es/MW/>

<sup>b</sup>Instituto Biofísica (CSIC, UPV/EHU), Leioa, 48940, Spain.

<sup>c</sup>Grupo de Espectroscopia Molecular, Edificio Quifima, Parque Científico UVA, Universidad de Valladolid, Valladolid, 47005 Spain.

**Figure S1.** Theoretically predicted 8 chiral pairs of conformations of DEET (B3LYP-GD3BJ/def2-TZVP)

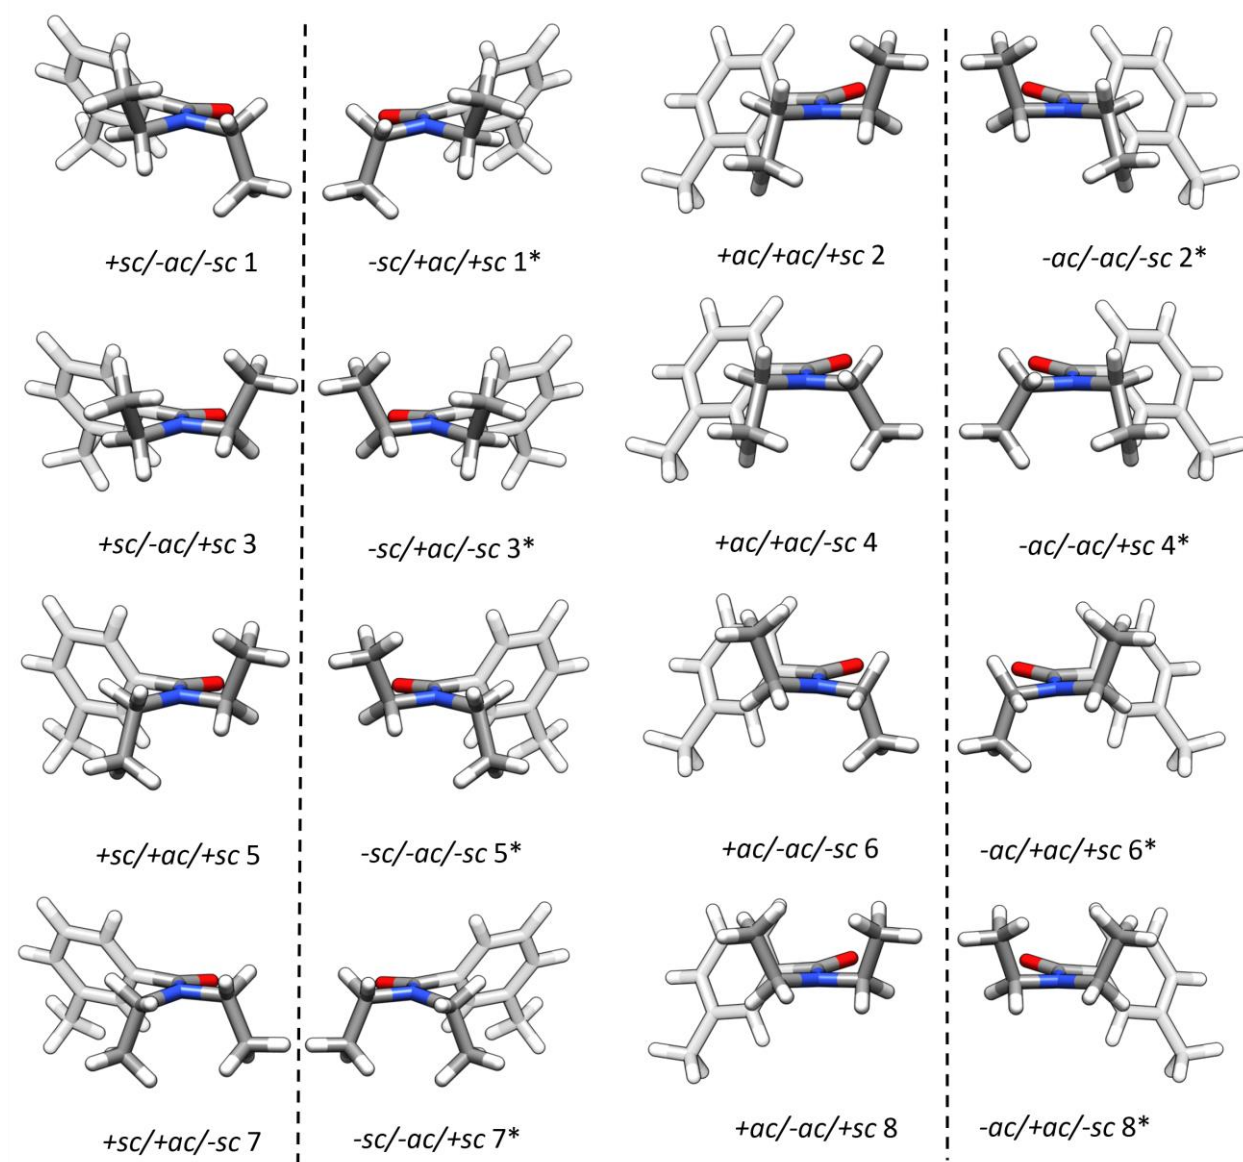

**Figure S2.** Predicted conformations of DEET (B3LYP-GD3BJ/def2-TZVP) showing the conversion pathways. The eight stable conformers of DEET connected through the changes in the  $\delta$  (blue arrows),  $\phi$  (green arrows), and  $\theta$  (red arrows) dihedral angles.

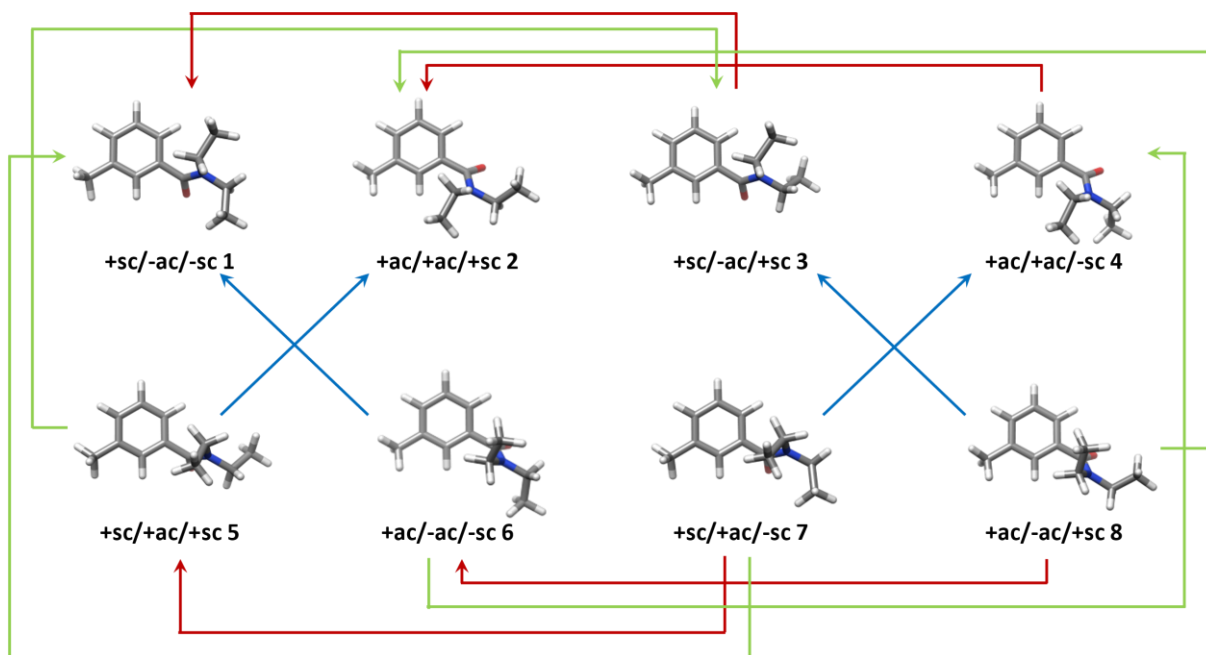

**Figure S3.** Potential energy surface scan of the  $\delta$  (C6-C1-C8-O1) dihedral angle. The scans were performed in steps of  $10^\circ$  at the B3LYP-D3BJ/def2-TZVP level of theory. Each conformer is illustrated in the plot close to their minima position in the scan. See figure 1 for atom labelling.

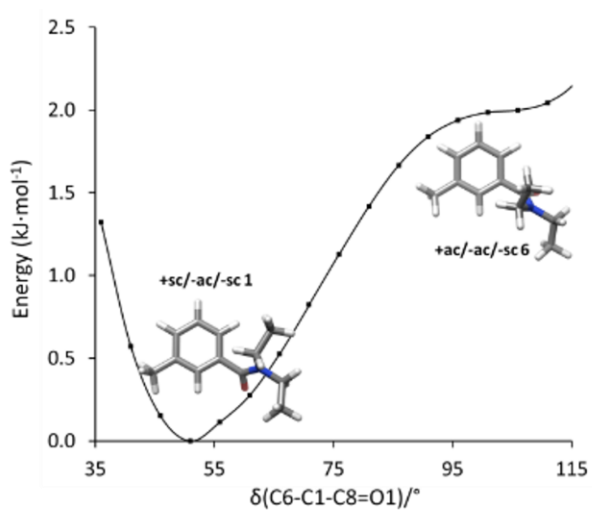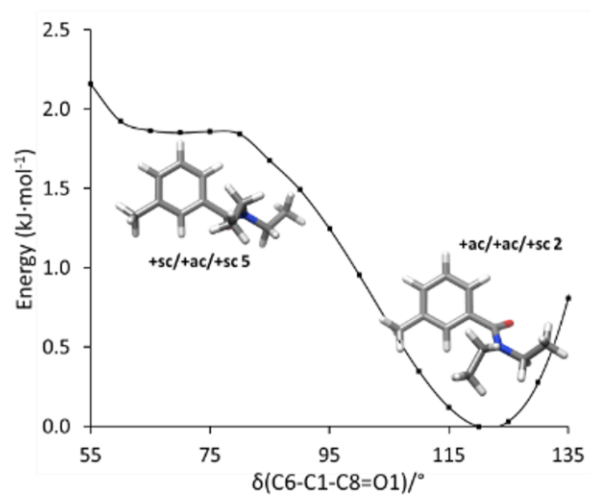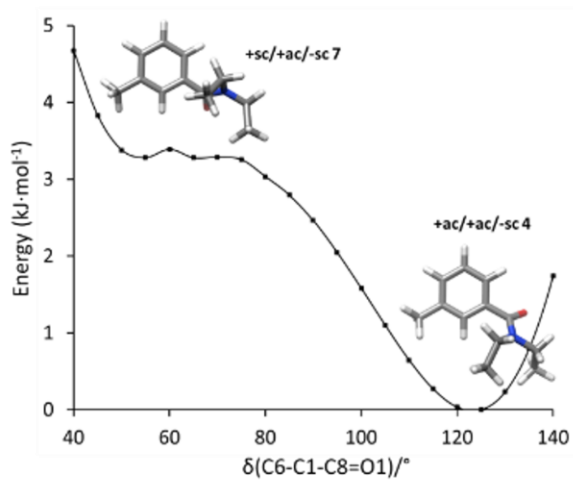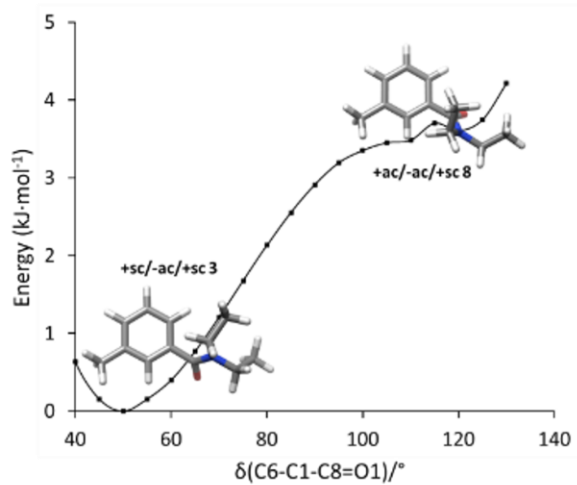

**Figure S4.** Potential energy surface scan of the  $\theta$  (C8-N1-C10-C12) dihedral angle. The scan was performed in steps of  $10^\circ$  at the B3LYP-D3BJ/def2-TZVP level of theory. Each conformer is illustrated in the plot close to their minima position in the scan. See figure 1 for atom labelling.

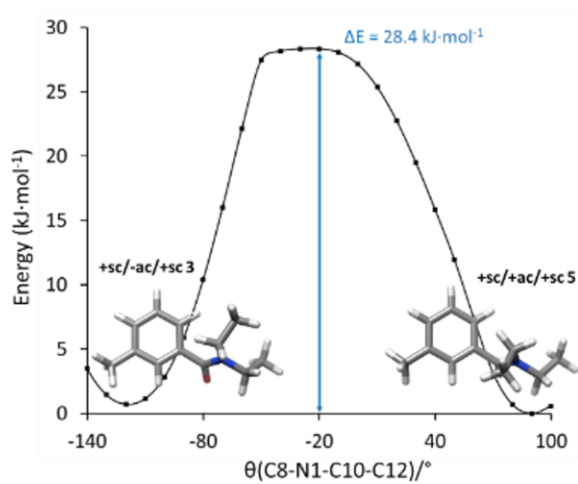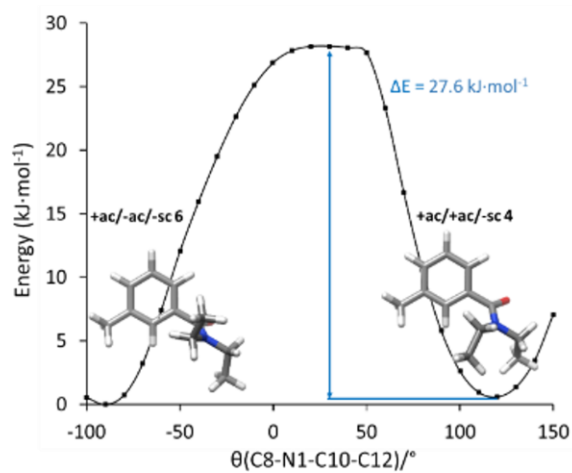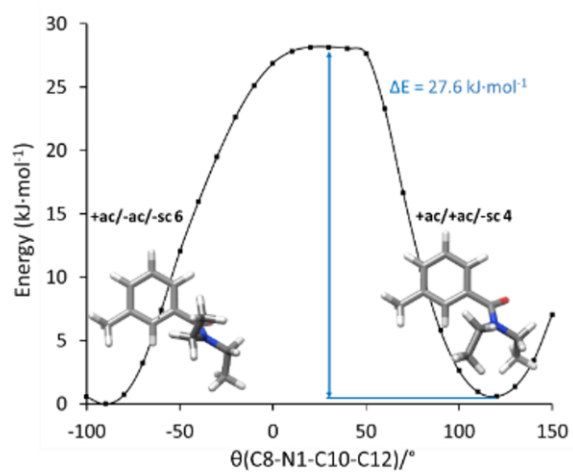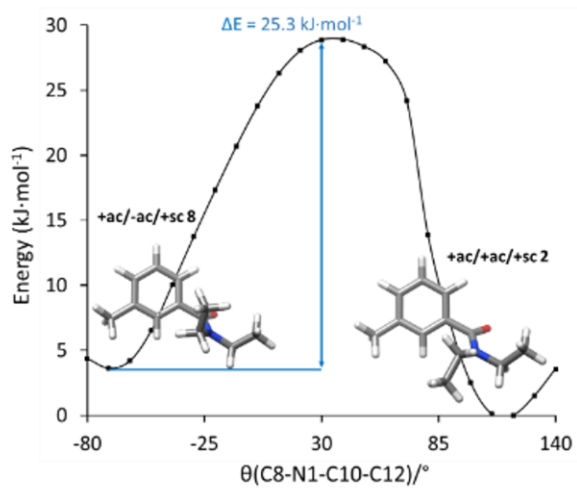

**Figure S5.** Potential energy surface scan of the  $\phi$  (C8-N1-C9-C11) dihedral angle. The scan was performed in steps of  $10^\circ$  at the B3LYP-D3BJ/def2-TZVP level of theory. Each conformer is illustrated in the plot close to their minima position in the scan. See figure 1 for atom labelling.

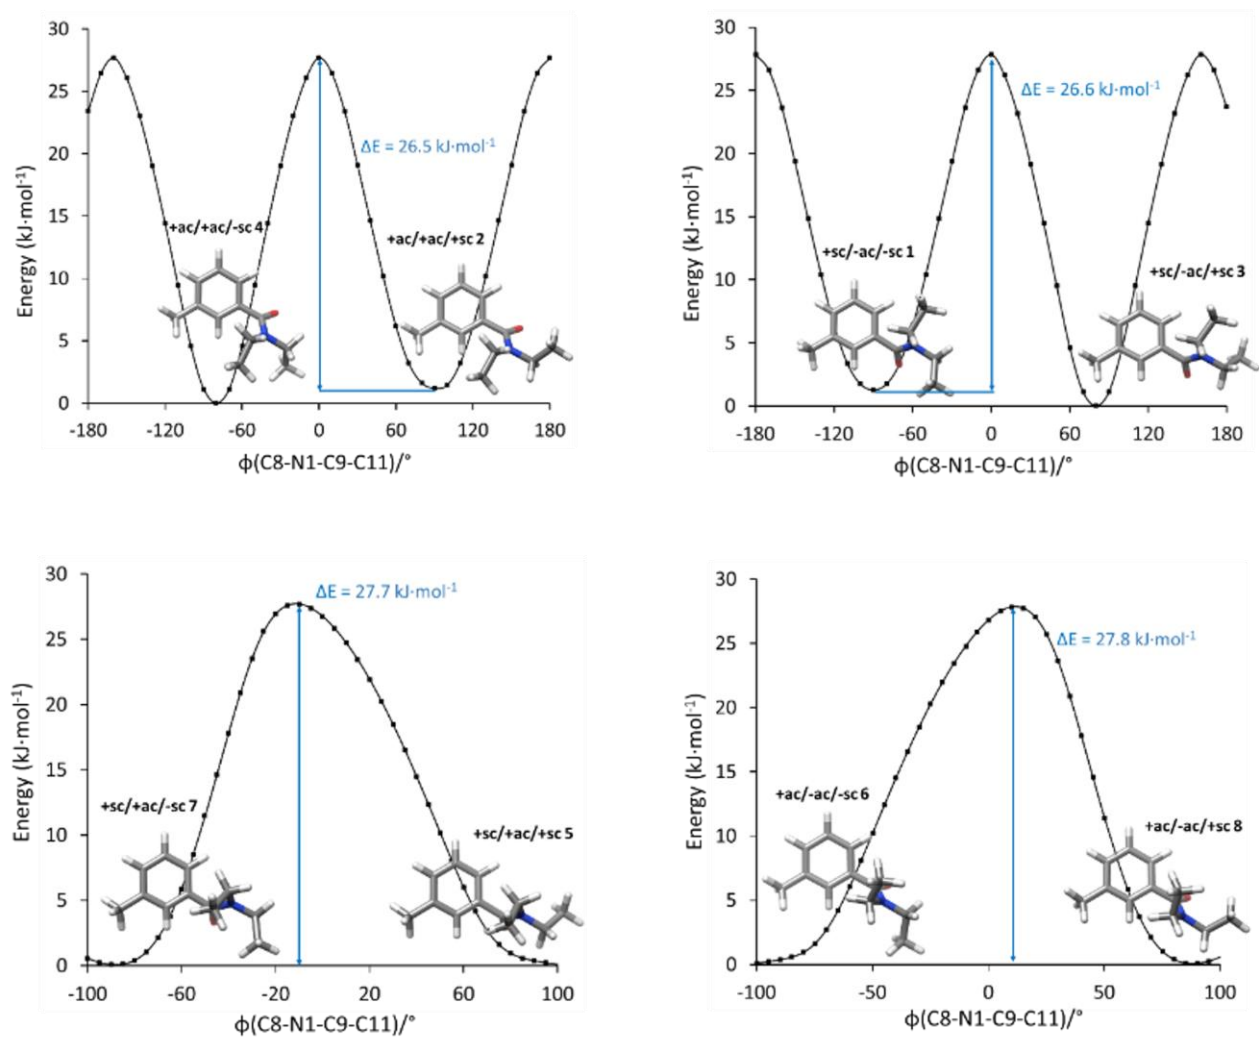

**Figure S6.** Full frequency range of the recorded rotational spectrum of DEET, experimental (upwards black trace) and simulations based on the experimental rotational parameters for the four observed conformers (downwards coloured traces).

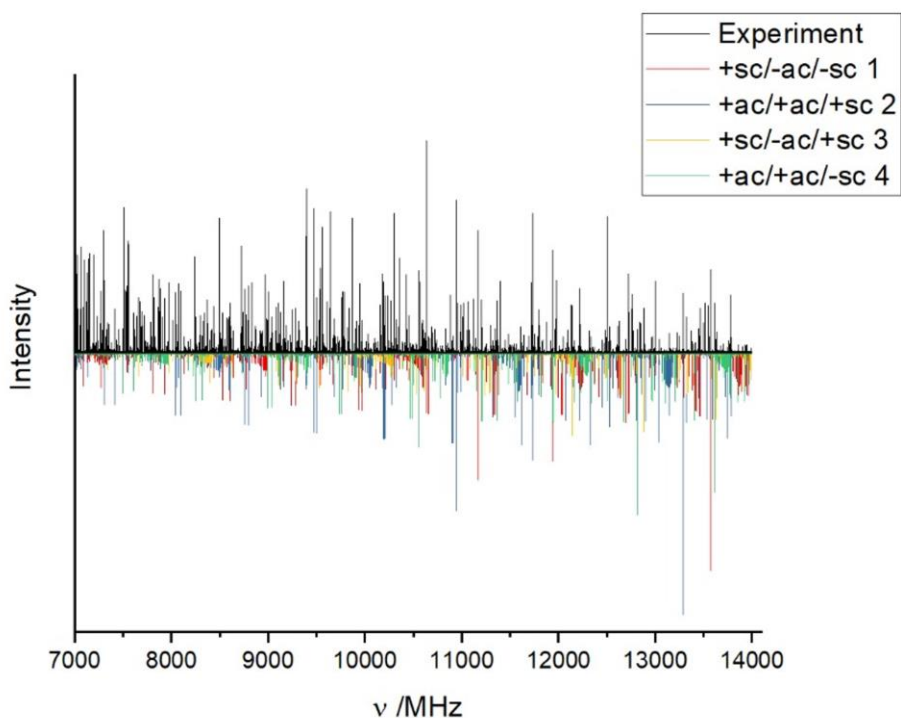

**Figure S7.** Excerpt of the DEET spectrum. The observed experimental spectrum is shown in the upward black trace, and the fitted spectra are displayed in the downward coloured trace. The hyperfine structure of the lines is shown for two different conformations of DEET, +sc/-ac/-sc 1 (red) and +sc/-ac/+sc 3 (green) for  $J'_{K_a K_c} \leftarrow J''_{K_a K_c}$  and  $F' \leftarrow F''$  transitions.

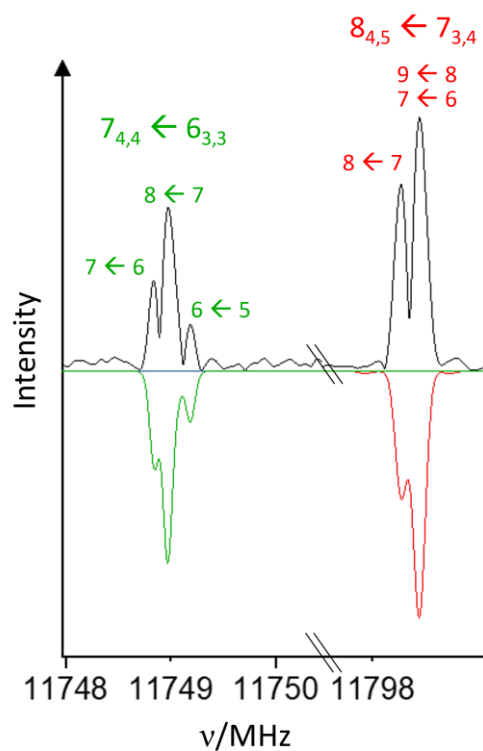

**Table S1.** Theoretical rotational parameters ( $A$ ,  $B$ ,  $C$ ,  $D_J$ ,  $D_{JK}$ ,  $D_K$ ),  $^{14}\text{N}$  quadrupole coupling constants ( $\chi_{ii}$ ), dipole moment components ( $\mu_i$ ) and planar moments of inertia ( $P_{ii}$ ) of DEET conformers at B3LYP-D3BJ/def2-TZVP from Gaussian computations. The energies ( $\Delta E_{\text{ZPE}}$ ) represent the difference of energy relative to the most stable conformer considering the zero-point energy correction.

|                                  | <i>+sc/-ac/-sc 1</i> | <i>+ac/+ac/+sc 2</i> | <i>+sc/-ac/+sc 3</i> | <i>+ac/+ac/-sc 4</i> | <i>+sc/+ac/+sc 5</i> | <i>+ac/-ac/-sc 6</i> | <i>+sc/+ac/-sc 7</i> | <i>+ac/-ac/+sc 8</i> |
|----------------------------------|----------------------|----------------------|----------------------|----------------------|----------------------|----------------------|----------------------|----------------------|
| $A$ [MHz]                        | 1201                 | 1178                 | 1313                 | 1134                 | 1253                 | 1129                 | 1289                 | 1283                 |
| $B$ [MHz]                        | 415                  | 436                  | 399                  | 440                  | 393                  | 405                  | 398                  | 405                  |
| $C$ [MHz]                        | 348                  | 356                  | 346                  | 368                  | 379                  | 394                  | 385                  | 385                  |
| $D_J$ [kHz]                      | 0.018                | 0.013                | 0.01                 | 0.016                | 0.044                | 0.02                 | 0.019                | 0.014                |
| $D_{JK}$ [kHz]                   | 0.167                | 0.084                | 0.154                | 0.027                | 0.373                | 0.249                | 0.034                | 0.122                |
| $D_K$ [kHz]                      | 0.015                | 0.031                | 0.026                | 0.112                | -0.173               | 0.084                | 0.321                | -0.050               |
| $\chi_{aa}$ [MHz]                | 2.1                  | 1.7                  | 1.9                  | 2.1                  | 1.9                  | 2.1                  | 2.1                  | 1.5                  |
| $\chi_{bb}$ [MHz]                | -0.6                 | -0.3                 | 0.6                  | 0.2                  | -0.7                 | -3.9                 | 0.2                  | 0.7                  |
| $\chi_{cc}$ [MHz]                | -1.4                 | -1.4                 | -2.5                 | -1.9                 | -1.2                 | 1.8                  | -2.3                 | -2.2                 |
| $ \mu_a / \mu_b / \mu_c $ [D]    | 0.0/2.7/2.3          | 0.6/3.2/1.9          | 0.0/3.1/1.6          | 0.4/3.4/1.7          | 0.1/2.9/2.4          | 0.4/0.6/3.8          | 0.1/3.0/2.0          | 0.6/3.5/1.4          |
| $P_{aa}/\mu\text{\AA}^2$         | 1124                 | 1074                 | 1171                 | 1038                 | 1107                 | 1041                 | 1095                 | 1084                 |
| $P_{bb}/\mu\text{\AA}^2$         | 327                  | 344                  | 289                  | 335                  | 225                  | 241                  | 218                  | 230                  |
| $P_{cc}/\mu\text{\AA}^2$         | 93                   | 84                   | 95                   | 110                  | 178                  | 206                  | 174                  | 164                  |
| $\Delta E_{\text{ZPE}}$ [kJ/mol] | 0                    | 0.1                  | 0.7                  | 0.8                  | 1.6                  | 1.6                  | 4.1                  | 4.2                  |



**Table S2.** Relative energies  $\Delta E$ ,  $\Delta E_{\text{ZPE}}$ , and  $\Delta G_{423}$  (all the values in kJ/mol) for the eight conformers of DEET at B3LYP-D3BJ/def2-TZVP calculated both with Gaussian and Orca. The relative populations (in percentage, %) have been estimated from the relative Gibbs free energies.

| Gaussian                | <i>+sc/-ac/-sc 1</i> | <i>+ac/+ac/+sc 2</i> | <i>+sc/-ac/+sc 3</i> | <i>+ac/+ac/-sc 4</i> | <i>+sc/+ac/+sc 5</i> | <i>+ac/-ac/-sc 6</i> | <i>+sc/+ac/-sc 7</i> | <i>+ac/-ac/+sc 8</i> |
|-------------------------|----------------------|----------------------|----------------------|----------------------|----------------------|----------------------|----------------------|----------------------|
| $\Delta E$              | 0.0                  | 0.0                  | 0.7                  | 0.7                  | 1.9                  | 2.0                  | 4.0                  | 4.2                  |
| $\Delta E_{\text{ZPE}}$ | 0.0                  | 0.1                  | 0.8                  | 0.8                  | 1.1                  | 1.3                  | 4.1                  | 4.3                  |
| $\Delta G_{423}$        | 1.3                  | 4.4                  | 2.6                  | 5.4                  | 0.0                  | 3.6                  | 7.1                  | 7.7                  |
| $N_i^a$                 | 23.3                 | 6.7                  | 13.6                 | 4.4                  | 39.0                 | 9.1                  | 2.2                  | 1.7                  |
| $N_{i,\text{relax}}^b$  | 32.3                 | 45.7                 | 15.3                 | 6.6                  | -                    | -                    | -                    | -                    |
| $N_{i,\text{exp}}^c$    | 34.4(0.8)            | 34.4(0.7)            | 17.2(0.6)            | 13.9(0.5)            | -                    | -                    | -                    | -                    |
| Orca                    | <i>+sc/-ac/-sc 1</i> | <i>+ac/+ac/+sc 2</i> | <i>+sc/-ac/+sc 3</i> | <i>+ac/+ac/-sc 4</i> | <i>+sc/+ac/+sc 5</i> | <i>+ac/-ac/-sc 6</i> | <i>+sc/+ac/-sc 7</i> | <i>+ac/-ac/+sc 8</i> |
| $\Delta E$              | 0.0                  | 0.1                  | 0.7                  | 0.7                  | 1.9                  | 1.9                  | 3.9                  | 4.1                  |
| $\Delta E_{\text{ZPE}}$ | 0.0                  | 0.1                  | 0.7                  | 0.7                  | 1.6                  | 1.6                  | 4.1                  | 4.2                  |
| $\Delta G_{423}$        | 0.1                  | 1.0                  | 1.4                  | 2.0                  | 0.0                  | 0.7                  | 4.7                  | 5.1                  |
| $N_i$                   | 20.7                 | 14.4                 | 12.2                 | 9.5                  | 21.4                 | 15.9                 | 3.2                  | 2.7                  |
| $N_{i,\text{relax}}$    | 36.6                 | 35.8                 | 14.9                 | 12.7                 | -                    | -                    | -                    | -                    |
| $N_{i,\text{exp}}$      | 34.4(0.8)            | 34.4(0.7)            | 17.2(0.6)            | 13.9(0.5)            | -                    | -                    | -                    | -                    |

<sup>a</sup> Estimated relative populations based on the Gibbs free energies for each conformer. <sup>b</sup> Estimated relative populations considering the described pathways for collisional relaxations. According to the scans and barriers reported in this work, the population of *+sc/+ac/+sc 5* is added to *+ac/+ac/+sc 2*; *+ac/-ac/-sc 6* to *+sc/-ac/-sc 1*; *+sc/+ac/-sc 7* to *+ac/+ac/-sc 4* and *+ac/-ac/+sc 8* to *+sc/-ac/+sc 3*. <sup>c</sup> Experimental relative populations from the observed intensities and the most intense dipole moment component.

**Table S3.** Observed frequencies and residuals (MHz) for  $+sc/-ac/-sc$  1 for  $J_{K_a'K_c'} \leftarrow J_{K_a''K_c''}$  and  $F' \leftarrow F''$  transitions.

| $J'$ | $K_a'$ | $K_c'$ | $J''$ | $K_a''$ | $K_c''$ | $F'$ | $F''$ | Obs       | Res     | $J'$ | $K_a'$ | $K_c'$ | $J''$ | $K_a''$ | $K_c''$ | $F'$ | $F''$ | Obs       | Res     | $J'$ | $K_a'$ | $K_c'$ | $J''$ | $K_a''$ | $K_c''$ | $F'$ | $F''$ | Obs       | Res     |
|------|--------|--------|-------|---------|---------|------|-------|-----------|---------|------|--------|--------|-------|---------|---------|------|-------|-----------|---------|------|--------|--------|-------|---------|---------|------|-------|-----------|---------|
| 7    | 2      | 6      | 6     | 1       | 5       | 7    | 6     | 7073.3208 | -0.0090 | 7    | 2      | 5      | 6     | 1       | 5       | 6    | 5     | 7556.2343 | -0.0568 | 9    | 2      | 8      | 8     | 1       | 7       | 8    | 7     | 8128.8932 | -0.0172 |
|      |        |        |       |         |         | 6    | 5     | 7073.3208 | -0.0090 |      |        |        |       |         |         | 7    | 6     | 7556.2343 | 0.0421  |      |        |        |       |         |         | 9    | 8     | 8128.8932 | -0.0508 |
|      |        |        |       |         |         | 8    | 7     | 7073.3208 | 0.0030  |      |        |        |       |         |         | 8    | 7     | 7556.2343 | -0.0322 | 8    | 2      | 6      | 7     | 1       | 6       | 8    | 7     | 8365.3712 | 0.0512  |
| 10   | 0      | 10     | 9     | 1       | 9       | 10   | 9     | 7087.6702 | 0.0000  | 8    | 2      | 7      | 7     | 1       | 6       | 7    | 6     | 7610.1778 | -0.0266 |      |        |        |       |         |         | 7    | 6     | 8365.3712 | -0.0424 |
|      |        |        |       |         |         | 11   | 10    | 7087.6702 | 0.0084  |      |        |        |       |         |         | 9    | 8     | 7610.1778 | -0.0194 |      |        |        |       |         |         | 9    | 8     | 8365.3712 | -0.0223 |
|      |        |        |       |         |         | 9    | 8     | 7087.6702 | -0.0002 |      |        |        |       |         |         | 8    | 7     | 7610.1778 | -0.0481 | 8    | 1      | 7      | 7     | 0       | 7       | 8    | 7     | 8391.5032 | -0.0012 |
| 4    | 3      | 2      | 3     | 2       | 1       | 4    | 3     | 7127.5511 | -0.0089 | 11   | 0      | 11     | 10    | 1       | 10      | 12   | 11    | 7812.3403 | 0.0082  |      |        |        |       |         |         | 9    | 8     | 8391.6904 | -0.0036 |
|      |        |        |       |         |         | 5    | 4     | 7127.7908 | 0.0009  |      |        |        |       |         |         | 10   | 9     | 7812.3403 | 0.0011  |      |        |        |       |         |         | 7    | 6     | 8391.6904 | -0.0422 |
|      |        |        |       |         |         | 3    | 2     | 7127.7908 | -0.0562 |      |        |        |       |         |         | 11   | 10    | 7812.3403 | 0.0000  | 12   | 1      | 11     | 11    | 2       | 10      | 12   | 11    | 8434.1408 | 0.0025  |
| 4    | 3      | 1      | 3     | 2       | 1       | 4    | 3     | 7128.7640 | 0.0049  | 6    | 2      | 4      | 5     | 1       | 5       | 6    | 5     | 7821.7545 | -0.0058 |      |        |        |       |         |         | 13   | 12    | 8434.1408 | 0.0041  |
|      |        |        |       |         |         | 5    | 4     | 7129.0010 | 0.0113  |      |        |        |       |         |         | 5    | 4     | 7822.1127 | -0.0362 |      |        |        |       |         |         | 11   | 10    | 8434.1408 | -0.0011 |
|      |        |        |       |         |         | 3    | 2     | 7129.0010 | -0.0461 |      |        |        |       |         |         | 7    | 6     | 7822.1127 | 0.0425  | 7    | 2      | 6      | 6     | 1       | 6       | 7    | 6     | 8505.4919 | -0.0030 |
| 4    | 3      | 2      | 3     | 2       | 2       | 4    | 3     | 7149.1662 | 0.0055  | 13   | 2      | 11     | 12    | 3       | 10      | 14   | 13    | 7833.9479 | -0.0119 |      |        |        |       |         |         | 8    | 7     | 8505.7205 | 0.0113  |
|      |        |        |       |         |         | 5    | 4     | 7149.4281 | 0.0192  |      |        |        |       |         |         | 12   | 11    | 7833.9479 | -0.0156 |      |        |        |       |         |         | 6    | 5     | 8505.7205 | -0.0390 |
|      |        |        |       |         |         | 3    | 2     | 7149.4281 | -0.0444 |      |        |        |       |         |         | 13   | 12    | 7833.9479 | -0.0133 | 12   | 0      | 12     | 11    | 1       | 11      | 11   | 10    | 8526.8638 | 0.0015  |
| 4    | 3      | 1      | 3     | 2       | 2       | 4    | 3     | 7150.3641 | 0.0044  | 5    | 3      | 3      | 4     | 2       | 2       | 5    | 4     | 7864.1335 | 0.0039  |      |        |        |       |         |         | 12   | 11    | 8526.8638 | -0.0002 |
|      |        |        |       |         |         | 5    | 4     | 7150.6312 | 0.0225  |      |        |        |       |         |         | 6    | 5     | 7864.3005 | -0.0128 |      |        |        |       |         |         | 13   | 12    | 8526.8638 | 0.0075  |
|      |        |        |       |         |         | 3    | 2     | 7150.6312 | -0.0414 |      |        |        |       |         |         | 5    | 4     | 7868.9121 | 0.0066  | 6    | 3      | 4      | 5     | 2       | 3       | 6    | 5     | 8573.4713 | -0.0141 |
| 7    | 1      | 6      | 6     | 0       | 6       | 7    | 6     | 7260.4371 | -0.0009 | 5    | 3      | 2      | 4     | 2       | 2       | 6    | 5     | 7869.0627 | -0.0288 |      |        |        |       |         |         | 7    | 6     | 8573.5989 | -0.0192 |
|      |        |        |       |         |         | 8    | 7     | 7260.6351 | 0.0076  |      |        |        |       |         |         | 5    | 5     | 7869.1701 | 0.0188  |      |        |        |       |         |         | 6    | 5     | 8587.7106 | 0.0057  |
|      |        |        |       |         |         | 6    | 5     | 7260.6351 | -0.0388 | 5    | 3      | 3      | 4     | 2       | 3       | 5    | 4     | 7928.1716 | 0.0054  | 6    | 3      | 3      | 5     | 2       | 3       | 7    | 6     | 8587.8275 | -0.0151 |
| 10   | 1      | 10     | 9     | 0       | 9       | 11   | 10    | 7272.0142 | 0.0203  |      |        |        |       |         |         | 4    | 3     | 7928.4101 | -0.0321 | 12   | 1      | 12     | 11    | 0       | 11      | 11   | 10    | 8605.6781 | 0.0016  |
|      |        |        |       |         |         | 9    | 8     | 7272.0142 | 0.0127  |      |        |        |       |         |         | 6    | 5     | 7928.4101 | 0.0268  |      |        |        |       |         |         | 13   | 12    | 8605.6781 | 0.0072  |
|      |        |        |       |         |         | 10   | 9     | 7272.0142 | 0.0008  | 5    | 3      | 2      | 4     | 2       | 3       | 5    | 4     | 7932.9506 | 0.0085  |      |        |        |       |         |         | 12   | 11    | 8605.6781 | -0.0052 |
| 11   | 1      | 10     | 10    | 2       | 9       | 12   | 11    | 7539.3848 | 0.0064  |      |        |        |       |         |         | 4    | 3     | 7933.1782 | -0.0426 | 10   | 2      | 9      | 9     | 1       | 8       | 11   | 10    | 8638.3795 | -0.0104 |
|      |        |        |       |         |         | 11   | 10    | 7539.3848 | 0.0040  |      |        |        |       |         |         | 6    | 5     | 7933.1782 | 0.0168  |      |        |        |       |         |         | 9    | 8     | 8638.3795 | -0.0134 |
|      |        |        |       |         |         | 10   | 9     | 7539.3848 | 0.0004  | 11   | 1      | 11     | 10    | 0       | 10      | 10   | 9     | 7933.9516 | 0.0122  |      |        |        |       |         |         | 10   | 9     | 8638.3795 | -0.0525 |
| 6    | 2      | 5      | 5     | 1       | 5       | 6    | 5     | 7539.7503 | -0.0015 |      |        |        |       |         |         | 11   | 10    | 7933.9516 | 0.0032  | 6    | 3      | 4      | 5     | 2       | 4       | 6    | 5     | 8719.6019 | 0.0031  |
|      |        |        |       |         |         | 7    | 6     | 7540.0279 | 0.0352  |      |        |        |       |         |         | 12   | 11    | 7933.9516 | 0.0187  |      |        |        |       |         |         | 7    | 6     | 8719.7698 | -0.0123 |
|      |        |        |       |         |         | 5    | 4     | 7540.0279 | -0.0319 | 9    | 2      | 8      | 8     | 1       | 7       | 10   | 9     | 8128.8932 | -0.0127 |      |        |        |       |         |         | 5    | 4     | 8719.7698 | -0.0581 |

| J  | K <sub>a</sub> | K <sub>c</sub> | J  | K <sub>a</sub> | K <sub>c</sub> | F  | F  | Obs       | Res     | J  | K <sub>a</sub> | K <sub>c</sub> | J  | K <sub>a</sub> | K <sub>c</sub> | F  | F  | Obs       | Res     | J  | K <sub>a</sub> | K <sub>c</sub> | J  | K <sub>a</sub> | K <sub>c</sub> | F  | F  | Obs        | Res     |
|----|----------------|----------------|----|----------------|----------------|----|----|-----------|---------|----|----------------|----------------|----|----------------|----------------|----|----|-----------|---------|----|----------------|----------------|----|----------------|----------------|----|----|------------|---------|
| 6  | 3              | 3              | 5  | 2              | 4              | 6  | 5  | 8733.8229 | 0.0047  | 7  | 3              | 4              | 6  | 2              | 4              | 7  | 6  | 9280.7863 | 0.0170  | 8  | 3              | 6              | 7  | 2              | 5              | 7  | 6  | 9873.6847  | 0.0007  |
|    |                |                |    |                |                | 7  | 6  | 8733.9920 | -0.0145 |    |                |                |    |                |                | 6  | 5  | 9280.8773 | -0.0150 |    |                |                |    |                |                | 7  | 8  | 9873.6847  | 0.0713  |
|    |                |                |    |                |                | 5  | 4  | 8733.9920 | -0.0612 |    |                |                |    |                |                | 8  | 7  | 9280.8773 | 0.0100  |    |                |                |    |                |                | 9  | 8  | 9873.6847  | 0.0163  |
| 4  | 4              | 1              | 3  | 3              | 0              | 3  | 2  | 8774.6021 | -0.0391 | 13 | 1              | 13             | 12 | 0              | 12             | 12 | 11 | 9284.5819 | 0.0076  | 14 | 0              | 14             | 13 | 1              | 13             | 14 | 13 | 9936.6794  | 0.0075  |
|    |                |                |    |                |                | 3  | 2  | 8774.6021 | -0.0447 |    |                |                |    |                |                | 13 | 12 | 9284.5819 | 0.0023  |    |                |                |    |                |                | 13 | 12 | 9936.6794  | 0.0098  |
|    |                |                |    |                |                | 4  | 3  | 8774.6021 | 0.0304  |    |                |                |    |                |                | 14 | 13 | 9284.5819 | 0.0125  |    |                |                |    |                |                | 15 | 14 | 9936.6794  | 0.0142  |
| 4  | 4              | 1              | 3  | 3              | 0              | 4  | 3  | 8774.6021 | 0.036   | 13 | 1              | 12             | 12 | 2              | 11             | 13 | 12 | 9293.3185 | -0.0041 | 8  | 3              | 5              | 7  | 2              | 5              | 9  | 8  | 9949.4617  | -0.0088 |
|    |                |                |    |                |                | 5  | 4  | 8774.7308 | 0.0422  |    |                |                |    |                |                | 14 | 13 | 9293.3185 | -0.0014 |    |                |                |    |                |                | 8  | 7  | 9949.4617  | 0.0591  |
| 4  | 4              | 0              | 3  | 3              | 1              | 4  | 3  | 8774.7308 | -0.0124 |    |                |                |    |                |                | 12 | 11 | 9293.3185 | -0.0058 |    |                |                |    |                |                | 7  | 6  | 9949.4617  | -0.0263 |
|    |                |                |    |                |                | 5  | 4  | 8774.8641 | -0.0019 | 8  | 2              | 7              | 7  | 1              | 7              | 8  | 7  | 9503.6857 | 0.0042  | 14 | 1              | 14             | 13 | 0              | 13             | 14 | 13 | 9968.4700  | -0.0008 |
|    |                |                |    |                |                | 3  | 2  | 8774.8641 | 0.0453  |    |                |                |    |                |                | 7  | 6  | 9503.8679 | -0.0484 |    |                |                |    |                |                | 15 | 14 | 9968.4700  | 0.0077  |
| 4  | 4              | 1              | 3  | 3              | 1              | 4  | 3  | 8774.7308 | -0.0068 |    |                |                |    |                |                | 9  | 8  | 9503.8679 | -0.0089 |    |                |                |    |                |                | 13 | 12 | 9968.4700  | 0.0033  |
|    |                |                |    |                |                | 5  | 4  | 8774.8641 | 0.0036  | 7  | 3              | 5              | 6  | 2              | 5              | 7  | 6  | 9527.6749 | 0.0082  | 14 | 1              | 13             | 13 | 2              | 12             | 13 | 12 | 10116.9886 | -0.0075 |
|    |                |                |    |                |                | 3  | 2  | 8774.8641 | 0.0509  |    |                |                |    |                |                | 8  | 7  | 9527.8009 | -0.0232 |    |                |                |    |                |                | 15 | 14 | 10116.9886 | -0.0038 |
| 4  | 4              | 0              | 3  | 3              | 0              | 5  | 4  | 8774.7308 | 0.0365  |    |                |                |    |                |                | 6  | 5  | 9527.8009 | -0.0586 |    |                |                |    |                |                | 14 | 13 | 10116.9886 | -0.0082 |
| 7  | 2              | 5              | 6  | 1              | 6              | 7  | 6  | 8988.3472 | -0.0100 | 5  | 4              | 2              | 4  | 3              | 1              | 5  | 4  | 9537.3581 | 0.0309  | 10 | 2              | 8              | 9  | 1              | 8              | 9  | 8  | 10155.1125 | -0.0099 |
|    |                |                |    |                |                | 8  | 7  | 8988.7026 | 0.0446  |    |                |                |    |                |                | 4  | 3  | 9537.5356 | 0.0076  |    |                |                |    |                |                | 11 | 10 | 10155.1126 | 0.0057  |
|    |                |                |    |                |                | 6  | 5  | 8988.7026 | -0.0182 |    |                |                |    |                |                | 6  | 5  | 9537.5356 | 0.0305  | 13 | 2              | 12             | 12 | 1              | 11             | 12 | 11 | 10214.5908 | -0.0107 |
| 11 | 2              | 10             | 10 | 1              | 9              | 11 | 10 | 9149.1186 | -0.0440 | 5  | 4              | 1              | 4  | 3              | 2              | 5  | 4  | 9538.5645 | -0.0122 |    |                |                |    |                |                | 14 | 13 | 10214.5908 | -0.0088 |
|    |                |                |    |                |                | 10 | 9  | 9149.1186 | -0.0042 |    |                |                |    |                |                | 4  | 3  | 9538.7451 | -0.0335 |    |                |                |    |                |                | 13 | 12 | 10214.5908 | -0.0433 |
|    |                |                |    |                |                | 12 | 11 | 9149.1186 | -0.0020 |    |                |                |    |                |                | 6  | 5  | 9538.7451 | -0.0104 | 8  | 2              | 6              | 7  | 1              | 7              | 8  | 7  | 10258.7677 | -0.0076 |
| 9  | 2              | 7              | 8  | 1              | 7              | 10 | 9  | 9229.3838 | -0.0117 | 7  | 3              | 4              | 6  | 2              | 5              | 7  | 6  | 9562.7812 | 0.0033  |    |                |                |    |                |                | 9  | 8  | 10259.1032 | 0.0301  |
|    |                |                |    |                |                | 9  | 8  | 9229.3838 | 0.0656  |    |                |                |    |                |                | 8  | 7  | 9562.9190 | -0.0256 |    |                |                |    |                |                | 7  | 6  | 10259.1032 | -0.0222 |
|    |                |                |    |                |                | 8  | 7  | 9229.3838 | -0.0291 |    |                |                |    |                |                | 6  | 5  | 9562.9190 | -0.0623 | 6  | 4              | 3              | 5  | 3              | 2              | 6  | 5  | 10297.6346 | 0.0006  |
| 13 | 0              | 13             | 12 | 1              | 12             | 14 | 13 | 9234.2158 | 0.0033  | 9  | 1              | 8              | 8  | 0              | 8              | 9  | 8  | 9574.6846 | 0.0019  |    |                |                |    |                |                | 5  | 4  | 10297.8586 | 0.0255  |
|    |                |                |    |                |                | 12 | 11 | 9234.2158 | -0.0018 |    |                |                |    |                |                | 8  | 7  | 9574.8684 | -0.0348 |    |                |                |    |                |                | 7  | 6  | 10297.8586 | 0.0560  |
|    |                |                |    |                |                | 13 | 12 | 9234.2158 | -0.0039 |    |                |                |    |                |                | 10 | 9  | 9574.8684 | -0.0021 | 6  | 4              | 2              | 5  | 3              | 2              | 6  | 5  | 10297.8586 | -0.0275 |
| 7  | 3              | 5              | 6  | 2              | 4              | 7  | 6  | 9245.7219 | 0.0636  | 12 | 2              | 11             | 11 | 1              | 10             | 13 | 12 | 9671.6306 | -0.0149 |    |                |                |    |                |                | 5  | 6  | 10298.0631 | -0.0103 |
|    |                |                |    |                |                | 8  | 7  | 9245.7219 | -0.0249 |    |                |                |    |                |                | 11 | 10 | 9671.6306 | -0.0168 |    |                |                |    |                |                | 7  | 6  | 10298.0631 | 0.0081  |
|    |                |                |    |                |                | 6  | 5  | 9245.7219 | -0.0486 |    |                |                |    |                |                | 12 | 11 | 9671.6306 | -0.0540 | 6  | 4              | 3              | 5  | 3              | 3              | 6  | 5  | 10302.4138 | 0.0039  |

| J  | K <sub>a</sub> | K <sub>c</sub> | J  | K <sub>a</sub> | K <sub>c</sub> | F  | F  | Obs        | Res     | J  | K <sub>a</sub> | K <sub>c</sub> | J  | K <sub>a</sub> | K <sub>c</sub> | F  | F  | Obs        | Res     | J  | K <sub>a</sub> | K <sub>c</sub> | J  | K <sub>a</sub> | K <sub>c</sub> | F  | F  | Obs        | Res     |
|----|----------------|----------------|----|----------------|----------------|----|----|------------|---------|----|----------------|----------------|----|----------------|----------------|----|----|------------|---------|----|----------------|----------------|----|----------------|----------------|----|----|------------|---------|
|    |                |                |    |                |                | 5  | 4  | 10302.6368 | 0.0251  |    |                |                |    |                |                | 9  | 8  | 10797.0672 | -0.0065 |    |                |                |    |                |                | 5  | 4  | 11172.7016 | 0.0722  |
|    |                |                |    |                |                | 7  | 6  | 10302.6368 | 0.0561  | 15 | 1              | 14             | 14 | 2              | 13             | 16 | 15 | 10908.6694 | 0.0269  | 5  | 5              | 1              | 4  | 4              | 1              | 5  | 4  | 11172.7016 | 0.0668  |
| 6  | 4              | 2              | 5  | 3              | 3              | 6  | 5  | 10302.6368 | -0.0251 |    |                |                |    |                |                | 15 | 14 | 10908.6694 | 0.0209  |    |                |                |    |                |                | 4  | 3  | 11172.7016 | 0.0165  |
|    |                |                |    |                |                | 7  | 6  | 10302.8307 | -0.0023 |    |                |                |    |                |                | 14 | 13 | 10908.6694 | 0.0237  |    |                |                |    |                |                | 6  | 5  | 11172.7016 | -0.0181 |
|    |                |                |    |                |                | 5  | 4  | 10302.8307 | -0.0333 | 10 | 3              | 8              | 9  | 2              | 7              | 10 | 9  | 10990.3165 | 0.0027  | 9  | 3              | 7              | 8  | 2              | 7              | 9  | 8  | 11209.7659 | -0.0034 |
| 8  | 3              | 6              | 7  | 2              | 6              | 8  | 7  | 10356.4783 | 0.0001  |    |                |                |    |                |                | 11 | 10 | 10990.3165 | 0.0010  |    |                |                |    |                |                | 8  | 7  | 11209.9134 | -0.0049 |
|    |                |                |    |                |                | 9  | 8  | 10356.6356 | 0.0183  |    |                |                |    |                |                | 9  | 8  | 10990.3165 | -0.0051 |    |                |                |    |                |                | 10 | 9  | 11209.9134 | 0.0179  |
|    |                |                |    |                |                | 7  | 6  | 10356.6356 | -0.0096 | 7  | 4              | 4              | 6  | 3              | 3              | 7  | 6  | 11052.5924 | -0.0003 | 10 | 3              | 7              | 9  | 2              | 7              | 10 | 9  | 11253.4984 | 0.0350  |
| 8  | 3              | 5              | 7  | 2              | 6              | 8  | 7  | 10432.2646 | -0.0002 |    |                |                |    |                |                | 8  | 7  | 11052.7379 | -0.0004 |    |                |                |    |                |                | 11 | 10 | 11253.4984 | -0.0008 |
|    |                |                |    |                |                | 7  | 6  | 10432.4266 | -0.0228 |    |                |                |    |                |                | 6  | 5  | 11052.7379 | -0.0273 |    |                |                |    |                |                | 9  | 8  | 11253.4984 | -0.0105 |
|    |                |                |    |                |                | 9  | 8  | 10432.4266 | 0.0072  | 7  | 4              | 3              | 6  | 3              | 3              | 7  | 6  | 11053.5176 | 0.0038  | 16 | 0              | 16             | 15 | 1              | 15             | 16 | 15 | 11332.8943 | 0.0043  |
| 9  | 3              | 7              | 8  | 2              | 6              | 10 | 9  | 10454.6898 | -0.0093 |    |                |                |    |                |                | 8  | 7  | 11053.6640 | 0.0042  |    |                |                |    |                |                | 17 | 16 | 11332.8943 | 0.0100  |
|    |                |                |    |                |                | 8  | 7  | 10454.6898 | -0.0193 |    |                |                |    |                |                | 6  | 5  | 11053.6640 | -0.0226 |    |                |                |    |                |                | 15 | 14 | 11332.8943 | 0.0065  |
|    |                |                |    |                |                | 9  | 8  | 10454.6898 | 0.0144  | 7  | 4              | 4              | 6  | 3              | 4              | 7  | 6  | 11066.8134 | 0.0012  | 16 | 1              | 16             | 15 | 0              | 15             | 16 | 15 | 11345.2173 | 0.0006  |
| 9  | 2              | 8              | 8  | 1              | 8              | 9  | 8  | 10532.7738 | 0.0061  |    |                |                |    |                |                | 6  | 5  | 11066.9772 | -0.0133 |    |                |                |    |                |                | 17 | 16 | 11345.2173 | 0.0069  |
|    |                |                |    |                |                | 8  | 7  | 10532.9582 | -0.0227 |    |                |                |    |                |                | 8  | 7  | 11066.9772 | 0.0143  |    |                |                |    |                |                | 15 | 14 | 11345.2173 | 0.0035  |
|    |                |                |    |                |                | 10 | 9  | 10532.9582 | 0.0092  | 7  | 4              | 3              | 6  | 3              | 4              | 7  | 6  | 11067.7359 | 0.0026  | 9  | 3              | 6              | 8  | 2              | 7              | 9  | 8  | 11357.1561 | -0.0039 |
| 9  | 3              | 6              | 8  | 2              | 6              | 10 | 9  | 10602.1399 | 0.0261  |    |                |                |    |                |                | 8  | 7  | 11067.8927 | 0.0085  |    |                |                |    |                |                | 8  | 7  | 11357.3276 | -0.0078 |
|    |                |                |    |                |                | 8  | 7  | 10602.1399 | 0.0135  |    |                |                |    |                |                | 6  | 5  | 11067.8927 | -0.0192 |    |                |                |    |                |                | 10 | 9  | 11357.3276 | 0.0176  |
| 15 | 0              | 15             | 14 | 1              | 14             | 16 | 15 | 10635.8568 | 0.0112  | 11 | 2              | 9              | 10 | 1              | 9              | 11 | 10 | 11147.9386 | -0.0148 | 15 | 2              | 14             | 14 | 1              | 13             | 15 | 14 | 11377.9994 | -0.0055 |
|    |                |                |    |                |                | 15 | 14 | 10635.8568 | 0.0050  |    |                |                |    |                |                | 10 | 9  | 11148.0474 | -0.0123 |    |                |                |    |                |                | 16 | 15 | 11377.9994 | 0.0189  |
|    |                |                |    |                |                | 14 | 13 | 10635.8568 | 0.0073  |    |                |                |    |                |                | 12 | 11 | 11148.0474 | 0.0021  |    |                |                |    |                |                | 14 | 13 | 11377.9994 | 0.0169  |
| 15 | 1              | 15             | 14 | 0              | 14             | 15 | 14 | 10655.7347 | 0.0012  | 5  | 5              | 0              | 4  | 4              | 1              | 4  | 3  | 11172.7016 | 0.0163  | 11 | 3              | 9              | 10 | 2              | 8              | 10 | 9  | 11485.0379 | 0.0093  |
|    |                |                |    |                |                | 16 | 15 | 10655.7347 | 0.0085  |    |                |                |    |                |                | 5  | 4  | 11172.7016 | 0.0666  |    |                |                |    |                |                | 11 | 10 | 11485.0379 | -0.0018 |
|    |                |                |    |                |                | 14 | 13 | 10655.7347 | 0.0047  |    |                |                |    |                |                | 6  | 5  | 11172.7016 | -0.0183 |    |                |                |    |                |                | 12 | 11 | 11485.0379 | 0.0130  |
| 14 | 2              | 13             | 13 | 1              | 12             | 13 | 12 | 10783.0433 | -0.0003 | 5  | 5              | 1              | 4  | 4              | 0              | 4  | 3  | 11172.7016 | 0.0221  | 16 | 1              | 15             | 15 | 2              | 14             | 16 | 15 | 11673.5809 | -0.0340 |
|    |                |                |    |                |                | 15 | 14 | 10783.0433 | 0.0015  |    |                |                |    |                |                | 5  | 4  | 11172.7016 | 0.0724  |    |                |                |    |                |                | 17 | 16 | 11673.5809 | -0.0269 |
|    |                |                |    |                |                | 14 | 13 | 10783.0433 | -0.0278 |    |                |                |    |                |                | 6  | 5  | 11172.7016 | -0.0125 |    |                |                |    |                |                | 15 | 14 | 11673.5809 | -0.0296 |
| 10 | 1              | 9              | 9  | 0              | 9              | 10 | 9  | 10796.8591 | -0.0033 | 5  | 5              | 0              | 4  | 4              | 0              | 4  | 3  | 11172.7016 | 0.0219  | 8  | 4              | 5              | 7  | 3              | 4              | 8  | 7  | 11797.7076 | -0.0023 |
|    |                |                |    |                |                | 11 | 10 | 10797.0672 | 0.0214  |    |                |                |    |                |                | 6  | 5  | 11172.7016 | -0.0126 |    |                |                |    |                |                | 9  | 8  | 11797.8430 | 0.0119  |

| J  | K <sub>a</sub> | K <sub>c</sub> | J  | K <sub>a</sub> | K <sub>c</sub> | F  | F  | Obs        | Res     | J  | K <sub>a</sub> | K <sub>c</sub> | J  | K <sub>a</sub> | K <sub>c</sub> | F  | F  | Obs        | Res        | J       | K <sub>a</sub> | K <sub>c</sub> | J  | K <sub>a</sub> | K <sub>c</sub> | F  | F  | Obs        | Res        |         |
|----|----------------|----------------|----|----------------|----------------|----|----|------------|---------|----|----------------|----------------|----|----------------|----------------|----|----|------------|------------|---------|----------------|----------------|----|----------------|----------------|----|----|------------|------------|---------|
|    |                |                |    |                |                | 7  | 6  | 11797.8430 | -0.0097 |    |                |                |    |                |                |    | 16 | 15         | 12028.5491 | 0.0028  |                |                |    |                |                |    | 6  | 5          | 12699.4349 | -0.0317 |
| 8  | 4              | 4              | 7  | 3              | 4              | 8  | 7  | 11800.4558 | -0.0006 | 17 | 1              | 17             | 16 | 0              | 16             | 16 | 15 | 12036.1226 | -0.0108    | 7       | 5              | 2              | 6  | 4              | 2              | 7  | 6  | 12699.0946 | 0.0274     |         |
|    |                |                |    |                |                | 7  | 6  | 11800.5911 | -0.0088 |    |                |                |    |                |                |    | 17 | 16         | 12036.1226 | -0.0133 |                |                |    |                |                |    | 6  | 5          | 12699.2451 | 0.0198  |
|    |                |                |    |                |                | 9  | 8  | 11800.5911 | 0.0128  |    |                |                |    |                |                |    | 18 | 17         | 12036.1226 | -0.0077 |                |                |    |                |                |    | 8  | 7          | 12699.2451 | 0.0373  |
| 8  | 4              | 5              | 7  | 3              | 5              | 8  | 7  | 11832.8182 | -0.0028 | 10 | 3              | 8              | 9  | 2              | 8              | 10 | 9  | 12090.6699 | -0.0179    | 7       | 5              | 2              | 6  | 4              | 3              | 7  | 6  | 12699.2451 | -0.0742    |         |
|    |                |                |    |                |                | 9  | 8  | 11832.9763 | 0.0248  |    |                |                |    |                |                |    | 11 | 10         | 12090.8246 | 0.0195  |                |                |    |                |                |    | 8  | 7          | 12699.4349 | -0.0251 |
|    |                |                |    |                |                | 7  | 6  | 11832.9763 | 0.0018  |    |                |                |    |                |                |    | 9  | 8          | 12090.8246 | 0.0003  |                |                |    |                |                |    | 6  | 5          | 12699.4349 | -0.0427 |
| 8  | 4              | 4              | 7  | 3              | 5              | 8  | 7  | 11835.5748 | 0.0072  | 12 | 2              | 10             | 11 | 1              | 10             | 13 | 12 | 12211.3889 | -0.0073    | 10      | 4              | 7              | 9  | 3              | 6              | 10 | 9  | 13230.5989 | 0.0647     |         |
|    |                |                |    |                |                | 9  | 8  | 11835.7113 | 0.0126  |    |                |                |    |                |                |    | 11 | 10         | 12211.3889 | -0.0209 |                |                |    |                |                |    | 11 | 10         | 13230.5989 | -0.0107 |
|    |                |                |    |                |                | 7  | 6  | 11835.7113 | -0.0103 | 10 | 3              | 7              | 9  | 2              | 8              | 10 | 9  | 12353.8314 | -0.0059    |         |                |                |    |                |                | 9  | 8  | 13230.5989 | -0.0236    |         |
| 11 | 3              | 8              | 10 | 2              | 8              | 11 | 10 | 11921.7517 | 0.0343  |    |                |                |    |                |                |    | 11 | 10         | 12354.0030 | 0.0141  | 10             | 4              | 6  | 9              | 3              | 6  | 9  | 8          | 13246.9096 | -0.0307 |
|    |                |                |    |                |                | 10 | 9  | 11921.7517 | -0.0046 |    |                |                |    |                |                |    | 9  | 8          | 12354.0030 | -0.0083 |                |                |    |                |                |    | 11 | 10         | 13246.9096 | -0.0176 |
|    |                |                |    |                |                | 12 | 11 | 11921.7517 | 0.0032  | 9  | 4              | 6              | 8  | 3              | 5              | 8  | 7  | 12526.6102 | -0.0193    |         |                |                |    |                |                | 10 | 9  | 13246.9096 | 0.0608     |         |
| 6  | 5              | 2              | 5  | 4              | 2              | 6  | 5  | 11936.1619 | -0.0385 |    |                |                |    |                |                |    | 10 | 9          | 12526.6102 | -0.0024 | 12             | 1              | 11 | 11             | 0              | 11 | 12 | 11         | 13295.8323 | 0.0224  |
|    |                |                |    |                |                | 7  | 6  | 11936.3168 | -0.0198 |    |                |                |    |                |                |    | 8  | 7          | 12533.7011 | 0.0085  |                |                |    |                |                |    | 11 | 10         | 13295.9990 | 0.0011  |
|    |                |                |    |                |                | 5  | 4  | 11936.3168 | -0.0278 | 9  | 4              | 5              | 8  | 3              | 5              | 10 | 9  | 12533.7011 | 0.0085     |         |                |                |    |                |                | 13 | 12 | 13295.9990 | 0.0217     |         |
| 6  | 5              | 2              | 5  | 4              | 1              | 6  | 5  | 11936.1619 | 0.0120  | 9  | 4              | 6              | 8  | 3              | 6              | 9  | 8  | 12602.3082 | 0.0064     | 10      | 4              | 7              | 9  | 3              | 7              | 11 | 10 | 13378.0146 | -0.0097    |         |
|    |                |                |    |                |                | 5  | 4  | 11936.3168 | 0.0227  |    |                |                |    |                |                |    | 8  | 7          | 12602.4337 | 0.0000  |                |                |    |                |                |    | 10 | 9          | 13378.0146 | 0.0897  |
|    |                |                |    |                |                | 7  | 6  | 11936.3168 | 0.0307  |    |                |                |    |                |                |    | 10 | 9          | 12602.4337 | 0.0188  |                |                |    |                |                |    | 9  | 8          | 13378.0146 | -0.0252 |
| 6  | 5              | 1              | 5  | 4              | 1              | 6  | 5  | 11936.1619 | 0.0101  | 9  | 4              | 5              | 8  | 3              | 6              | 9  | 8  | 12609.3802 | 0.0001     | 10      | 4              | 6              | 9  | 3              | 7              | 10 | 9  | 13394.2317 | -0.0077    |         |
|    |                |                |    |                |                | 7  | 6  | 11936.3168 | 0.0289  |    |                |                |    |                |                |    | 8  | 7          | 12609.5096 | -0.0040 |                |                |    |                |                |    | 9  | 8          | 13394.3463 | -0.0112 |
|    |                |                |    |                |                | 5  | 4  | 11936.3168 | 0.0209  |    |                |                |    |                |                |    | 10 | 9          | 12609.5096 | 0.0149  |                |                |    |                |                |    | 11 | 10         | 13394.3463 | 0.0046  |
| 6  | 5              | 1              | 5  | 4              | 2              | 6  | 5  | 11936.1619 | -0.0403 | 12 | 3              | 9              | 11 | 2              | 9              | 11 | 10 | 12624.9903 | -0.0197    | 11      | 3              | 8              | 10 | 2              | 9              | 11 | 10 | 13438.2930 | -0.0151    |         |
|    |                |                |    |                |                | 5  | 4  | 11936.3168 | -0.0296 |    |                |                |    |                |                |    | 13 | 12         | 12624.9903 | -0.0127 |                |                |    |                |                |    | 12 | 11         | 13438.4705 | 0.0051  |
|    |                |                |    |                |                | 7  | 6  | 11936.3168 | -0.0216 |    |                |                |    |                |                |    | 12 | 11         | 12624.9903 | 0.0186  |                |                |    |                |                |    | 10 | 9          | 13438.4705 | -0.0154 |
| 12 | 3              | 10             | 11 | 2              | 9              | 11 | 10 | 11945.2888 | -0.0207 | 7  | 5              | 3              | 6  | 4              | 2              | 7  | 6  | 12699.0946 | 0.0384     | 8       | 5              | 4              | 7  | 4              | 3              | 8  | 7  | 13460.6787 | 0.0074     |         |
|    |                |                |    |                |                | 12 | 11 | 11945.2888 | -0.0456 |    |                |                |    |                |                |    | 6  | 5          | 12699.2451 | 0.0308  |                |                |    |                |                |    | 8  | 7          | 13460.6787 | -0.0399 |
|    |                |                |    |                |                | 13 | 12 | 11945.2888 | -0.0186 |    |                |                |    |                |                |    | 8  | 7          | 12699.2451 | 0.0483  |                |                |    |                |                |    | 9  | 8          | 13460.8645 | 0.0625  |
| 17 | 0              | 17             | 16 | 1              | 16             | 18 | 17 | 12028.5491 | 0.0059  | 7  | 5              | 3              | 6  | 4              | 3              | 7  | 6  | 12699.2451 | -0.0633    | 8       | 5              | 3              | 7  | 4              | 3              | 7  | 6  | 13460.8645 | -0.0030    |         |
|    |                |                |    |                |                | 17 | 16 | 12028.5491 | 0.0008  |    |                |                |    |                |                |    | 8  | 7          | 12699.4349 | -0.0141 |                |                |    |                |                |    | 9  | 8          | 13460.8645 | 0.0151  |

| J  | K <sub>a</sub> | K <sub>c</sub> | J  | K <sub>a</sub> | K <sub>c</sub> | F  | F'' | Obs        | Res     |
|----|----------------|----------------|----|----------------|----------------|----|-----|------------|---------|
|    |                |                |    |                |                | 7  | 6   | 13460.8645 | 0.0444  |
| 8  | 5              | 4              | 7  | 4              | 4              | 8  | 7   | 13461.5949 | 0.0025  |
|    |                |                |    |                |                | 8  | 7   | 13461.5949 | -0.0448 |
|    |                |                |    |                |                | 9  | 8   | 13461.7719 | 0.0011  |
| 8  | 5              | 4              | 7  | 4              | 4              | 9  | 8   | 13461.7719 | 0.0486  |
|    |                |                |    |                |                | 7  | 6   | 13461.7719 | -0.0169 |
|    |                |                |    |                |                | 7  | 6   | 13461.7719 | 0.0304  |
| 6  | 6              | 0              | 5  | 5              | 1              | 6  | 5   | 13570.5202 | -0.0299 |
|    |                |                |    |                |                | 5  | 4   | 13570.6291 | 0.0430  |
|    |                |                |    |                |                | 7  | 6   | 13570.6291 | 0.0166  |
| 6  | 6              | 0              | 5  | 5              | 0              | 6  | 5   | 13570.5202 | -0.0297 |
|    |                |                |    |                |                | 5  | 4   | 13570.6291 | 0.0432  |
|    |                |                |    |                |                | 7  | 6   | 13570.6291 | 0.0168  |
| 6  | 6              | 1              | 5  | 5              | 0              | 6  | 5   | 13570.5202 | -0.0297 |
|    |                |                |    |                |                | 5  | 4   | 13570.6291 | 0.0432  |
|    |                |                |    |                |                | 7  | 6   | 13570.6291 | 0.0168  |
| 6  | 6              | 1              | 5  | 5              | 1              | 6  | 5   | 13570.5202 | -0.0299 |
|    |                |                |    |                |                | 5  | 4   | 13570.6291 | 0.0430  |
|    |                |                |    |                |                | 7  | 6   | 13570.6291 | 0.0166  |
| 11 | 4              | 7              | 10 | 3              | 7              | 10 | 9   | 13934.3757 | -0.0023 |
|    |                |                |    |                |                | 12 | 11  | 13934.3757 | 0.0077  |
| 12 | 3              | 10             | 11 | 2              | 10             | 12 | 11  | 13944.1225 | -0.0026 |
|    |                |                |    |                |                | 11 | 10  | 13944.2289 | -0.0175 |
|    |                |                |    |                |                | 13 | 12  | 13944.2289 | -0.0032 |
| 13 | 5              | 8              | 13 | 4              | 9              | 12 | 12  | 7138.3616  | -0.0233 |
|    |                |                |    |                |                | 14 | 14  | 7138.3616  | -0.0161 |
| 12 | 5              | 8              | 12 | 4              | 8              | 11 | 11  | 7205.0791  | -0.0058 |
|    |                |                |    |                |                | 13 | 13  | 7205.0791  | 0.0037  |
| 12 | 5              | 7              | 12 | 4              | 8              | 12 | 12  | 7208.0902  | -0.0121 |
|    |                |                |    |                |                | 11 | 11  | 7208.2270  | 0.0006  |

| J  | K <sub>a</sub> | K <sub>c</sub> | J  | K <sub>a</sub> | K <sub>c</sub> | F  | F'' | Obs       | Res     |
|----|----------------|----------------|----|----------------|----------------|----|-----|-----------|---------|
|    |                |                |    |                |                | 13 | 13  | 7208.2270 | 0.0102  |
| 13 | 5              | 9              | 13 | 4              | 10             | 14 | 14  | 7254.7222 | -0.0003 |
|    |                |                |    |                |                | 12 | 12  | 7254.7222 | -0.0084 |
| 11 | 5              | 6              | 11 | 4              | 7              | 11 | 11  | 7257.2083 | 0.0058  |
|    |                |                |    |                |                | 10 | 10  | 7257.3425 | -0.0126 |
|    |                |                |    |                |                | 12 | 12  | 7257.3425 | 0.0001  |
| 12 | 5              | 8              | 12 | 4              | 9              | 12 | 12  | 7272.1903 | -0.0101 |
|    |                |                |    |                |                | 11 | 11  | 7272.3280 | -0.0048 |
|    |                |                |    |                |                | 13 | 13  | 7272.3280 | 0.0054  |
| 11 | 5              | 7              | 11 | 4              | 8              | 10 | 10  | 7290.4013 | -0.0333 |
|    |                |                |    |                |                | 12 | 12  | 7290.4013 | -0.0201 |
| 10 | 5              | 5              | 10 | 4              | 6              | 10 | 10  | 7291.1560 | -0.0126 |
|    |                |                |    |                |                | 9  | 9   | 7291.3373 | -0.0199 |
|    |                |                |    |                |                | 11 | 11  | 7291.3373 | -0.0027 |
| 10 | 5              | 6              | 10 | 4              | 7              | 10 | 10  | 7306.9802 | -0.0098 |
|    |                |                |    |                |                | 11 | 11  | 7307.1649 | 0.0006  |
|    |                |                |    |                |                | 9  | 9   | 7307.1649 | -0.0168 |
| 10 | 5              | 5              | 10 | 4              | 7              | 10 | 10  | 7307.4892 | 0.0059  |
|    |                |                |    |                |                | 11 | 11  | 7307.6686 | 0.0110  |
|    |                |                |    |                |                | 9  | 9   | 7307.6686 | -0.0064 |
| 9  | 5              | 5              | 9  | 4              | 5              | 9  | 9   | 7314.1646 | -0.0104 |
|    |                |                |    |                |                | 8  | 8   | 7314.4185 | 0.0078  |
|    |                |                |    |                |                | 10 | 10  | 7314.4185 | 0.0315  |
| 9  | 5              | 4              | 9  | 4              | 5              | 9  | 9   | 7314.3212 | -0.0191 |
|    |                |                |    |                |                | 8  | 8   | 7314.582  | 0.0060  |
|    |                |                |    |                |                | 10 | 10  | 7314.582  | 0.0297  |
| 9  | 5              | 5              | 9  | 4              | 6              | 9  | 9   | 7321.2426 | -0.0108 |
|    |                |                |    |                |                | 8  | 8   | 7321.4738 | -0.0168 |
|    |                |                |    |                |                | 10 | 10  | 7321.4738 | 0.0070  |
| 9  | 5              | 4              | 9  | 4              | 6              | 8  | 8   | 7321.6636 | 0.0076  |

| J | K <sub>a</sub> | K <sub>c</sub> | J | K <sub>a</sub> | K <sub>c</sub> | F  | F'' | Obs       | Res     |
|---|----------------|----------------|---|----------------|----------------|----|-----|-----------|---------|
|   |                |                |   |                |                | 10 | 10  | 7321.6636 | 0.0315  |
| 5 | 5              | 1              | 5 | 4              | 1              | 5  | 5   | 7350.5989 | 0.0226  |
|   |                |                |   |                |                | 6  | 6   | 7351.2276 | 0.0209  |
|   |                |                |   |                |                | 4  | 4   | 7351.3666 | 0.0317  |
| 5 | 5              | 1              | 5 | 4              | 2              | 5  | 5   | 7350.5989 | -0.0279 |
|   |                |                |   |                |                | 6  | 6   | 7351.2276 | -0.0296 |
|   |                |                |   |                |                | 4  | 4   | 7351.3666 | -0.0189 |
| 5 | 5              | 0              | 5 | 4              | 1              | 5  | 5   | 7350.5989 | 0.0224  |
|   |                |                |   |                |                | 6  | 6   | 7351.2276 | 0.0208  |
|   |                |                |   |                |                | 4  | 4   | 7351.3666 | 0.0315  |
| 5 | 5              | 0              | 5 | 4              | 2              | 5  | 5   | 7350.5989 | -0.0281 |
|   |                |                |   |                |                | 6  | 6   | 7351.2276 | -0.0297 |
|   |                |                |   |                |                | 4  | 4   | 7351.3666 | -0.019  |
| 7 | 6              | 1              | 7 | 5              | 2              | 7  | 7   | 8981.8041 | 0.0083  |
|   |                |                |   |                |                | 8  | 8   | 8982.2305 | 0.0144  |
|   |                |                |   |                |                | 6  | 6   | 8982.2305 | -0.0461 |
| 7 | 6              | 1              | 7 | 5              | 3              | 7  | 7   | 8981.8041 | -0.0026 |
|   |                |                |   |                |                | 8  | 8   | 8982.2305 | 0.0034  |
|   |                |                |   |                |                | 6  | 6   | 8982.2305 | -0.0570 |
| 7 | 6              | 2              | 7 | 5              | 2              | 7  | 7   | 8981.8041 | 0.0083  |
|   |                |                |   |                |                | 8  | 8   | 8982.2305 | 0.0145  |
|   |                |                |   |                |                | 6  | 6   | 8982.2305 | -0.0460 |
| 7 | 6              | 2              | 7 | 5              | 3              | 7  | 7   | 8981.8041 | -0.0025 |
|   |                |                |   |                |                | 8  | 8   | 8982.2305 | 0.0035  |
|   |                |                |   |                |                | 6  | 6   | 8982.2305 | -0.0570 |
| 6 | 6              | 1              | 6 | 5              | 1              | 6  | 6   | 8984.9828 | 0.0081  |
|   |                |                |   |                |                | 7  | 7   | 8985.5486 | 0.0173  |
|   |                |                |   |                |                | 5  | 5   | 8985.5486 | -0.0765 |
| 6 | 6              | 1              | 6 | 5              | 2              | 6  | 6   | 8984.9828 | 0.0063  |
|   |                |                |   |                |                | 7  | 7   | 8985.5486 | 0.0155  |

| J  | K <sub>a</sub> | K <sub>c</sub> | J  | K <sub>a</sub> | K <sub>c</sub> | F  | F  | Obs        | Res     |
|----|----------------|----------------|----|----------------|----------------|----|----|------------|---------|
|    |                |                |    |                |                | 5  | 5  | 8985.5486  | -0.0783 |
| 6  | 6              | 0              | 6  | 5              | 1              | 6  | 6  | 8984.9828  | 0.0081  |
|    |                |                |    |                |                | 5  | 5  | 8985.5486  | -0.0765 |
|    |                |                |    |                |                | 7  | 7  | 8985.5486  | 0.0173  |
| 6  | 6              | 0              | 6  | 5              | 2              | 6  | 6  | 8984.9828  | 0.0063  |
|    |                |                |    |                |                | 5  | 5  | 8985.5486  | -0.0783 |
|    |                |                |    |                |                | 7  | 7  | 8985.5486  | 0.0155  |
| 11 | 7              | 4              | 11 | 6              | 6              | 11 | 11 | 10599.1931 | -0.0293 |
|    |                |                |    |                |                | 12 | 12 | 10599.4186 | -0.0174 |
|    |                |                |    |                |                | 10 | 10 | 10599.4186 | -0.0369 |
| 11 | 7              | 4              | 11 | 6              | 5              | 11 | 11 | 10599.1931 | -0.0009 |
|    |                |                |    |                |                | 10 | 10 | 10599.4186 | -0.0085 |
|    |                |                |    |                |                | 12 | 12 | 10599.4186 | 0.0109  |
| 11 | 7              | 5              | 11 | 6              | 6              | 11 | 11 | 10599.1931 | -0.0289 |
|    |                |                |    |                |                | 10 | 10 | 10599.4186 | -0.0365 |
|    |                |                |    |                |                | 12 | 12 | 10599.4186 | -0.0170 |
| 11 | 7              | 5              | 11 | 6              | 5              | 11 | 11 | 10599.1931 | -0.0005 |
|    |                |                |    |                |                | 10 | 10 | 10599.4186 | -0.0082 |
|    |                |                |    |                |                | 12 | 12 | 10599.4186 | 0.0112  |
| 10 | 7              | 3              | 10 | 6              | 4              | 10 | 10 | 10606.7172 | 0.0060  |
|    |                |                |    |                |                | 9  | 9  | 10606.9872 | -0.0058 |
|    |                |                |    |                |                | 11 | 11 | 10606.9872 | 0.0199  |
| 10 | 7              | 3              | 10 | 6              | 5              | 10 | 10 | 10606.7172 | -0.0023 |
|    |                |                |    |                |                | 11 | 11 | 10606.9872 | 0.0115  |
|    |                |                |    |                |                | 9  | 9  | 10606.9872 | -0.0141 |
| 10 | 7              | 4              | 10 | 6              | 4              | 10 | 10 | 10606.7172 | 0.0061  |
|    |                |                |    |                |                | 9  | 9  | 10606.9872 | -0.0057 |
|    |                |                |    |                |                | 11 | 11 | 10606.9872 | 0.0200  |
| 10 | 7              | 4              | 10 | 6              | 5              | 10 | 10 | 10606.7172 | -0.0022 |
|    |                |                |    |                |                | 11 | 11 | 10606.9872 | 0.0116  |

| J | K <sub>a</sub> | K <sub>c</sub> | J | K <sub>a</sub> | K <sub>c</sub> | F  | F  | Obs        | Res     |
|---|----------------|----------------|---|----------------|----------------|----|----|------------|---------|
|   |                |                |   |                |                | 9  | 9  | 10606.9872 | -0.014  |
| 9 | 7              | 2              | 9 | 6              | 3              | 9  | 9  | 10612.3329 | 0.0059  |
|   |                |                |   |                |                | 10 | 10 | 10612.6646 | 0.0253  |
|   |                |                |   |                |                | 8  | 8  | 10612.6646 | -0.0096 |
| 9 | 7              | 2              | 9 | 6              | 4              | 9  | 9  | 10612.3329 | 0.0038  |
|   |                |                |   |                |                | 10 | 10 | 10612.6646 | 0.0232  |
|   |                |                |   |                |                | 8  | 8  | 10612.6646 | -0.0117 |
| 9 | 7              | 3              | 9 | 6              | 3              | 9  | 9  | 10612.3329 | 0.0059  |
|   |                |                |   |                |                | 8  | 8  | 10612.6646 | -0.0096 |
|   |                |                |   |                |                | 10 | 10 | 10612.6646 | 0.0253  |
| 9 | 7              | 3              | 9 | 6              | 4              | 9  | 9  | 10612.3329 | 0.0038  |
|   |                |                |   |                |                | 8  | 8  | 10612.6646 | -0.0117 |
|   |                |                |   |                |                | 10 | 10 | 10612.6646 | 0.0232  |
| 7 | 7              | 0              | 7 | 6              | 1              | 7  | 7  | 10619.2166 | 0.0137  |
|   |                |                |   |                |                | 6  | 6  | 10619.7264 | -0.0457 |
|   |                |                |   |                |                | 8  | 8  | 10619.7264 | 0.0259  |
| 7 | 7              | 0              | 7 | 6              | 2              | 7  | 7  | 10619.2166 | 0.0136  |
|   |                |                |   |                |                | 8  | 8  | 10619.7264 | 0.0258  |
|   |                |                |   |                |                | 6  | 6  | 10619.7264 | -0.0458 |
| 7 | 7              | 1              | 7 | 6              | 1              | 7  | 7  | 10619.2166 | 0.0137  |
|   |                |                |   |                |                | 6  | 6  | 10619.7264 | -0.0457 |
|   |                |                |   |                |                | 8  | 8  | 10619.7264 | 0.0259  |
| 7 | 7              | 1              | 7 | 6              | 2              | 7  | 7  | 10619.2166 | 0.0136  |
|   |                |                |   |                |                | 6  | 6  | 10619.7264 | -0.0458 |
|   |                |                |   |                |                | 8  | 8  | 10619.7264 | 0.0258  |

**Table S4.** Observed frequencies and residuals (MHz) for  $+ac/+ac/+sc$  2 for  $J_{K_a'K_c'} \leftarrow J_{K_a''K_c''}$  and  $F' \leftarrow F''$  transitions.

| $J'$ | $K_a'$ | $K_c'$ | $J''$ | $K_a''$ | $K_c''$ | $F'$ | $F''$ | Obs       | Res     | $J'$ | $K_a'$ | $K_c'$ | $J''$ | $K_a''$ | $K_c''$ | $F'$ | $F''$ | Obs       | Res     | $J'$ | $K_a'$ | $K_c'$ | $J''$ | $K_a''$ | $K_c''$ | $F'$ | $F''$ | Obs       | Res     |
|------|--------|--------|-------|---------|---------|------|-------|-----------|---------|------|--------|--------|-------|---------|---------|------|-------|-----------|---------|------|--------|--------|-------|---------|---------|------|-------|-----------|---------|
| 7    | 2      | 6      | 6     | 1       | 5       | 6    | 5     | 7021.6049 | 0.0190  |      |        |        |       |         |         | 6    | 5     | 7661.3157 | -0.0222 |      |        |        |       |         |         | 7    | 6     | 8096.5694 | 0.0332  |
|      |        |        |       |         |         | 8    | 7     | 7021.6049 | 0.0159  | 6    | 2      | 5      | 5     | 1       | 5       | 6    | 5     | 7688.6738 | 0.0018  | 11   | 1      | 11     | 10    | 0       | 10      | 12   | 11    | 8101.4138 | 0.0077  |
|      |        |        |       |         |         | 7    | 6     | 7021.6049 | -0.0688 |      |        |        |       |         |         | 7    | 6     | 7688.9879 | 0.0456  |      |        |        |       |         |         | 11   | 10    | 8101.4138 | -0.0106 |
| 4    | 3      | 2      | 3     | 2       | 1       | 4    | 3     | 7031.1347 | -0.0041 |      |        |        |       |         |         | 5    | 4     | 7688.9879 | -0.0236 |      |        |        |       |         |         | 10   | 9     | 8101.4138 | 0.0021  |
|      |        |        |       |         |         | 5    | 4     | 7031.2945 | -0.0034 | 7    | 2      | 5      | 6     | 1       | 5       | 7    | 6     | 7706.1053 | 0.0657  | 6    | 3      | 4      | 5     | 2       | 3       | 5    | 4     | 8499.2031 | -0.0225 |
|      |        |        |       |         |         | 3    | 2     | 7031.2945 | -0.0407 |      |        |        |       |         |         | 6    | 5     | 7706.1053 | -0.0300 |      |        |        |       |         |         | 7    | 6     | 8499.2031 | -0.0045 |
| 4    | 3      | 1      | 3     | 2       | 1       | 4    | 3     | 7033.3914 | -0.0069 |      |        |        |       |         |         | 8    | 7     | 7706.1053 | -0.0099 |      |        |        |       |         |         | 6    | 5     | 8499.2031 | 0.0540  |
|      |        |        |       |         |         | 5    | 4     | 7033.5519 | -0.0077 | 5    | 3      | 3      | 4     | 2       | 2       | 5    | 4     | 7784.6297 | 0.0030  | 10   | 2      | 9      | 9     | 1       | 8       | 9    | 8     | 8593.2274 | 0.0283  |
|      |        |        |       |         |         | 3    | 2     | 7033.5519 | -0.0457 |      |        |        |       |         |         | 4    | 3     | 7784.7485 | -0.0197 |      |        |        |       |         |         | 10   | 9     | 8593.2274 | -0.0575 |
| 4    | 3      | 2      | 3     | 2       | 2       | 4    | 3     | 7063.4255 | -0.0021 |      |        |        |       |         |         | 6    | 5     | 7784.7485 | 0.0107  |      |        |        |       |         |         | 11   | 10    | 8593.2274 | 0.0253  |
|      |        |        |       |         |         | 3    | 2     | 7063.6455 | -0.0296 | 5    | 3      | 2      | 4     | 2       | 2       | 5    | 4     | 7793.6068 | 0.0031  | 4    | 4      | 1      | 3     | 3       | 0       | 4    | 3     | 8600.1028 | 0.0094  |
|      |        |        |       |         |         | 5    | 4     | 7063.6455 | 0.0209  |      |        |        |       |         |         | 4    | 3     | 7793.7154 | -0.0375 |      |        |        |       |         |         | 5    | 4     | 8600.1851 | -0.0010 |
| 4    | 3      | 1      | 3     | 2       | 2       | 4    | 3     | 7065.6852 | -0.0018 |      |        |        |       |         |         | 6    | 5     | 7793.7156 | -0.0055 |      |        |        |       |         |         | 3    | 2     | 8600.1859 | 0.0365  |
|      |        |        |       |         |         | 5    | 4     | 7065.8929 | 0.0066  | 5    | 3      | 3      | 4     | 2       | 3       | 5    | 4     | 7879.7243 | 0.0010  | 4    | 4      | 0      | 3     | 3       | 1       | 4    | 3     | 8600.4419 | 0.0114  |
|      |        |        |       |         |         | 3    | 2     | 7065.8929 | -0.0445 |      |        |        |       |         |         | 6    | 5     | 7879.9117 | 0.0101  |      |        |        |       |         |         | 3    | 2     | 8600.4419 | -0.0453 |
| 10   | 1      | 9      | 9     | 2       | 8       | 9    | 8     | 7141.2372 | -0.0115 |      |        |        |       |         |         | 4    | 3     | 7879.9117 | -0.0377 |      |        |        |       |         |         | 5    | 4     | 8600.5457 | 0.0218  |
|      |        |        |       |         |         | 10   | 9     | 7141.2372 | 0.0158  | 5    | 3      | 2      | 4     | 2       | 3       | 5    | 4     | 7888.7013 | 0.0010  | 8    | 2      | 6      | 7     | 1       | 6       | 8    | 7     | 8602.4003 | -0.0033 |
|      |        |        |       |         |         | 11   | 10    | 7141.2372 | -0.0036 |      |        |        |       |         |         | 4    | 5     | 7888.8977 | 0.0190  |      |        |        |       |         |         | 9    | 8     | 8602.5109 | 0.0150  |
| 10   | 0      | 10     | 9     | 1       | 9       | 9    | 8     | 7306.9802 | -0.0001 |      |        |        |       |         |         | 4    | 3     | 7888.8977 | -0.0362 |      |        |        |       |         |         | 7    | 6     | 8602.5109 | -0.0039 |
|      |        |        |       |         |         | 11   | 10    | 7306.9802 | 0.0075  | 11   | 0      | 11     | 10    | 1       | 10      | 11   | 10    | 8036.8568 | -0.0081 | 6    | 3      | 4      | 5     | 2       | 4       | 6    | 5     | 8713.6755 | -0.0012 |
|      |        |        |       |         |         | 10   | 9     | 7306.9802 | -0.0018 |      |        |        |       |         |         | 10   | 9     | 8036.8568 | -0.0048 |      |        |        |       |         |         | 7    | 6     | 8713.8262 | -0.0091 |
| 10   | 1      | 10     | 9     | 0       | 9       | 9    | 8     | 7412.4976 | -0.0011 |      |        |        |       |         |         | 12   | 11    | 8036.8568 | 0.0015  |      |        |        |       |         |         | 5    | 4     | 8713.8262 | -0.0474 |
|      |        |        |       |         |         | 10   | 9     | 7412.4976 | -0.0189 | 11   | 1      | 10     | 10    | 2       | 9       | 10   | 9     | 8057.0674 | -0.0135 | 7    | 2      | 6      | 6     | 1       | 6       | 7    | 6     | 8720.9436 | 0.0041  |
|      |        |        |       |         |         | 11   | 10    | 7412.4976 | 0.0050  |      |        |        |       |         |         | 12   | 11    | 8057.0674 | -0.0073 |      |        |        |       |         |         | 6    | 5     | 8721.2261 | -0.0174 |
| 8    | 2      | 7      | 7     | 1       | 6       | 7    | 6     | 7553.8429 | 0.0141  |      |        |        |       |         |         | 11   | 10    | 8057.0674 | 0.0050  |      |        |        |       |         |         | 8    | 7     | 8721.2261 | 0.0361  |
|      |        |        |       |         |         | 9    | 8     | 7553.8429 | 0.0100  | 9    | 2      | 8      | 8     | 1       | 7       | 10   | 9     | 8073.0850 | 0.0119  | 6    | 3      | 3      | 5     | 2       | 4       | 6    | 5     | 8740.2799 | -0.0022 |
| 22   | 3      | 19     | 21    | 5       | 16      | 23   | 22    | 7643.8373 | 0.0130  |      |        |        |       |         |         | 9    | 8     | 8073.0850 | -0.0781 |      |        |        |       |         |         | 7    | 6     | 8740.4442 | -0.0097 |
|      |        |        |       |         |         | 22   | 21    | 7643.9586 | -0.0140 |      |        |        |       |         |         | 8    | 7     | 8073.0850 | 0.0158  | 12   | 0      | 12     | 11    | 1       | 11      | 11   | 10    | 8759.1525 | 0.0001  |
| 7    | 1      | 6      | 6     | 0       | 6       | 7    | 6     | 7661.0103 | -0.0007 | 6    | 2      | 4      | 5     | 1       | 5       | 6    | 5     | 8096.1296 | -0.0042 |      |        |        |       |         |         | 13   | 12    | 8759.1525 | 0.0054  |
|      |        |        |       |         |         | 8    | 7     | 7661.3157 | 0.0335  |      |        |        |       |         |         | 5    | 4     | 8096.5694 | -0.0583 |      |        |        |       |         |         | 12   | 11    | 8759.1525 | -0.0040 |



| J  | K <sub>a</sub> | K <sub>c</sub> | J'' | K <sub>a</sub> '' | K <sub>c</sub> '' | F  | F'' | Obs       | Res     | J  | K <sub>a</sub> | K <sub>c</sub> | J'' | K <sub>a</sub> '' | K <sub>c</sub> '' | F  | F'' | Obs        | Res     | J  | K <sub>a</sub> | K <sub>c</sub> | J'' | K <sub>a</sub> '' | K <sub>c</sub> '' | F  | F'' | Obs        | Res     |
|----|----------------|----------------|-----|-------------------|-------------------|----|-----|-----------|---------|----|----------------|----------------|-----|-------------------|-------------------|----|-----|------------|---------|----|----------------|----------------|-----|-------------------|-------------------|----|-----|------------|---------|
| 12 | 1              | 12             | 11  | 0                 | 11                | 13 | 12  | 8797.9796 | 0.0102  | 13 | 1              | 13             | 12  | 0                 | 12                | 13 | 12  | 9499.5727  | -0.0107 | 6  | 4              | 3              | 5   | 3                 | 2                 | 6  | 5   | 10180.589  | -0.0081 |
|    |                |                |     |                   |                   | 12 | 11  | 8797.9796 | -0.0041 |    |                |                |     |                   |                   | 12 | 11  | 9499.5727  | -0.0034 |    |                |                |     |                   |                   | 5  | 6   | 10180.7391 | 0.0026  |
|    |                |                |     |                   |                   | 11 | 10  | 8797.9796 | 0.0053  |    |                |                |     |                   |                   | 14 | 13  | 9499.5727  | 0.0009  |    |                |                |     |                   |                   | 5  | 5   | 10180.7391 | 0.0338  |
| 12 | 1              | 11             | 11  | 2                 | 10                | 12 | 11  | 8929.1757 | -0.0013 | 9  | 2              | 7              | 8   | 1                 | 7                 | 9  | 8   | 9570.3744  | -0.0060 | 6  | 4              | 2              | 5   | 3                 | 2                 | 6  | 5   | 10181.1869 | -0.0076 |
|    |                |                |     |                   |                   | 13 | 12  | 8929.1757 | -0.0060 |    |                |                |     |                   |                   | 8  | 7   | 9570.5126  | 0.0028  |    |                |                |     |                   |                   | 5  | 4   | 10181.3286 | -0.0119 |
|    |                |                |     |                   |                   | 11 | 10  | 8929.1757 | -0.0108 |    |                |                |     |                   |                   | 10 | 9   | 9570.5126  | 0.0214  |    |                |                |     |                   |                   | 7  | 6   | 10181.3286 | 0.0101  |
| 11 | 2              | 10             | 10  | 1                 | 9                 | 10 | 9   | 9128.2228 | 0.0340  | 7  | 3              | 5              | 6   | 2                 | 5                 | 7  | 6   | 9570.7917  | 0.0110  | 6  | 4              | 3              | 5   | 3                 | 3                 | 6  | 5   | 10189.5660 | -0.0082 |
|    |                |                |     |                   |                   | 12 | 11  | 9128.2228 | 0.0321  |    |                |                |     |                   |                   | 6  | 5   | 9570.9213  | -0.0351 |    |                |                |     |                   |                   | 7  | 6   | 10189.7137 | 0.0096  |
|    |                |                |     |                   |                   | 11 | 10  | 9128.2228 | -0.0396 |    |                |                |     |                   |                   | 8  | 7   | 9570.9213  | -0.0042 |    |                |                |     |                   |                   | 5  | 4   | 10189.7137 | -0.0135 |
| 7  | 3              | 5              | 6   | 2                 | 4                 | 7  | 6   | 9163.3456 | 0.0268  | 7  | 3              | 4              | 6   | 2                 | 5                 | 7  | 6   | 9635.9779  | 0.0036  | 6  | 4              | 2              | 5   | 3                 | 3                 | 6  | 5   | 10190.1678 | -0.0037 |
|    |                |                |     |                   |                   | 8  | 7   | 9163.3456 | 0.0139  |    |                |                |     |                   |                   | 6  | 5   | 9636.1342  | -0.0436 |    |                |                |     |                   |                   | 7  | 6   | 10190.3227 | 0.0207  |
|    |                |                |     |                   |                   | 6  | 5   | 9163.3456 | 0.0054  |    |                |                |     |                   |                   | 8  | 7   | 9636.1342  | -0.0092 |    |                |                |     |                   |                   | 5  | 4   | 10190.3227 | -0.0024 |
| 5  | 4              | 2              | 4   | 3                 | 1                 | 5  | 4   | 9392.4796 | -0.0082 | 12 | 2              | 11             | 11  | 1                 | 10                | 11 | 10  | 9688.8168  | 0.0244  | 14 | 0              | 14             | 13  | 1                 | 13                | 13 | 12  | 10190.8758 | 0.0036  |
|    |                |                |     |                   |                   | 4  | 3   | 9392.6313 | -0.0065 |    |                |                |     |                   |                   | 12 | 11  | 9688.8168  | -0.0355 |    |                |                |     |                   |                   | 15 | 14  | 10190.8758 | 0.0075  |
|    |                |                |     |                   |                   | 6  | 5   | 9392.6313 | 0.0099  |    |                |                |     |                   |                   | 13 | 12  | 9688.8168  | 0.0237  |    |                |                |     |                   |                   | 14 | 13  | 10190.8758 | -0.0005 |
| 5  | 4              | 1              | 4   | 3                 | 1                 | 5  | 4   | 9392.6313 | 0.0234  | 13 | 1              | 12             | 12  | 2                 | 11                | 14 | 13  | 9759.9459  | 0.0042  | 14 | 1              | 14             | 13  | 0                 | 13                | 14 | 13  | 10204.3824 | -0.0017 |
|    |                |                |     |                   |                   | 4  | 3   | 9392.7676 | 0.0097  |    |                |                |     |                   |                   | 13 | 12  | 9759.9459  | 0.0024  |    |                |                |     |                   |                   | 15 | 14  | 10204.3824 | 0.0080  |
|    |                |                |     |                   |                   | 6  | 5   | 9392.7676 | 0.0262  |    |                |                |     |                   |                   | 12 | 11  | 9759.9459  | 0.0005  |    |                |                |     |                   |                   | 13 | 12  | 10204.3824 | 0.0041  |
| 5  | 4              | 2              | 4   | 3                 | 2                 | 5  | 4   | 9394.7300 | -0.0173 | 8  | 3              | 6              | 7   | 2                 | 5                 | 7  | 6   | 9771.7035  | 0.0210  | 13 | 2              | 12             | 12  | 1                 | 11                | 12 | 11  | 10280.1152 | 0.0024  |
|    |                |                |     |                   |                   | 4  | 3   | 9394.8641 | -0.0361 |    |                |                |     |                   |                   | 9  | 8   | 9771.7035  | 0.0235  |    |                |                |     |                   |                   | 14 | 13  | 10280.1152 | 0.0025  |
|    |                |                |     |                   |                   | 6  | 5   | 9394.8641 | -0.0190 |    |                |                |     |                   |                   | 8  | 7   | 9771.7035  | -0.0001 |    |                |                |     |                   |                   | 13 | 12  | 10280.1152 | -0.0447 |
| 5  | 4              | 1              | 4   | 3                 | 2                 | 5  | 4   | 9394.8641 | -0.0032 | 8  | 2              | 7              | 7   | 1                 | 7                 | 8  | 7   | 9789.9622  | 0.0126  | 9  | 3              | 7              | 8   | 2                 | 6                 | 8  | 7   | 10325.2290 | 0.0136  |
|    |                |                |     |                   |                   | 6  | 5   | 9395.0227 | 0.0195  |    |                |                |     |                   |                   | 7  | 6   | 9790.1922  | -0.0362 |    |                |                |     |                   |                   | 10 | 9   | 10325.2290 | 0.0124  |
|    |                |                |     |                   |                   | 4  | 3   | 9395.0227 | 0.0024  |    |                |                |     |                   |                   | 9  | 8   | 9790.1922  | 0.0068  |    |                |                |     |                   |                   | 9  | 8   | 10325.2290 | -0.0384 |
| 7  | 2              | 5              | 6   | 1                 | 6                 | 7  | 6   | 9405.3013 | -0.0040 | 8  | 3              | 5              | 7   | 2                 | 5                 | 7  | 6   | 9910.7830  | 0.0078  | 8  | 3              | 6              | 7   | 2                 | 6                 | 8  | 7   | 10456.0678 | -0.0016 |
|    |                |                |     |                   |                   | 6  | 5   | 9405.7681 | -0.0249 |    |                |                |     |                   |                   | 8  | 7   | 9910.7830  | 0.0312  |    |                |                |     |                   |                   | 7  | 6   | 10456.2199 | -0.0120 |
|    |                |                |     |                   |                   | 8  | 7   | 9405.7681 | 0.0517  |    |                |                |     |                   |                   | 9  | 8   | 9910.7830  | 0.0152  |    |                |                |     |                   |                   | 9  | 8   | 10456.2199 | 0.0136  |
| 13 | 0              | 13             | 12  | 1                 | 12                | 12 | 11  | 9476.5423 | -0.0049 | 9  | 1              | 8              | 8   | 0                 | 8                 | 9  | 8   | 10166.9792 | 0.0047  | 14 | 1              | 13             | 13  | 2                 | 12                | 15 | 14  | 10555.7529 | 0.0150  |
|    |                |                |     |                   |                   | 13 | 12  | 9476.5423 | -0.0092 |    |                |                |     |                   |                   | 8  | 7   | 10167.2414 | -0.0375 |    |                |                |     |                   |                   | 13 | 12  | 10555.7529 | 0.0121  |
|    |                |                |     |                   |                   | 14 | 13  | 9476.5423 | -0.0003 |    |                |                |     |                   |                   | 10 | 9   | 10167.2414 | 0.0024  |    |                |                |     |                   |                   | 14 | 13  | 10555.7529 | 0.0086  |

| J' | K <sub>a</sub> ' | K <sub>c</sub> ' | J'' | K <sub>a</sub> '' | K <sub>c</sub> '' | F' | F'' | Obs        | Res     |
|----|------------------|------------------|-----|-------------------|-------------------|----|-----|------------|---------|
| 8  | 3                | 5                | 7   | 2                 | 6                 | 8  | 7   | 10595.1175 | -0.0001 |
|    |                  |                  |     |                   |                   | 7  | 6   | 10595.2972 | -0.0275 |
|    |                  |                  |     |                   |                   | 9  | 8   | 10595.2972 | 0.0030  |
| 15 | 0                | 15               | 14  | 1                 | 14                | 16 | 15  | 10903.3128 | 0.0015  |
|    |                  |                  |     |                   |                   | 14 | 13  | 10903.3128 | -0.0019 |
|    |                  |                  |     |                   |                   | 15 | 14  | 10903.3128 | -0.0058 |
| 5  | 5                | 1                | 4   | 4                 | 0                 | 6  | 5   | 10944.1852 | -0.0085 |
|    |                  |                  |     |                   |                   | 5  | 4   | 10944.1852 | 0.0560  |
|    |                  |                  |     |                   |                   | 4  | 3   | 10944.1852 | 0.0181  |
| 7  | 4                | 4                | 6   | 3                 | 3                 | 7  | 6   | 10959.3697 | -0.0051 |
|    |                  |                  |     |                   |                   | 8  | 7   | 10959.5000 | 0.0234  |
|    |                  |                  |     |                   |                   | 6  | 5   | 10959.5000 | 0.0048  |
| 7  | 4                | 3                | 6   | 3                 | 3                 | 7  | 6   | 10961.5529 | 0.0016  |
|    |                  |                  |     |                   |                   | 6  | 5   | 10961.6810 | 0.0081  |
|    |                  |                  |     |                   |                   | 8  | 7   | 10961.6810 | 0.0269  |
| 7  | 4                | 4                | 6   | 3                 | 4                 | 7  | 6   | 10985.9716 | -0.0086 |
|    |                  |                  |     |                   |                   | 8  | 7   | 10986.1214 | 0.0261  |
|    |                  |                  |     |                   |                   | 6  | 5   | 10986.1214 | 0.0053  |
| 7  | 4                | 3                | 6   | 3                 | 4                 | 7  | 6   | 10988.1506 | -0.0060 |
|    |                  |                  |     |                   |                   | 8  | 7   | 10988.2992 | 0.0264  |
|    |                  |                  |     |                   |                   | 6  | 5   | 10988.2992 | 0.0054  |
| 9  | 3                | 6                | 8   | 2                 | 7                 | 9  | 8   | 11639.4808 | -0.0071 |
|    |                  |                  |     |                   |                   | 8  | 7   | 11639.6889 | -0.0194 |
|    |                  |                  |     |                   |                   | 10 | 9   | 11639.6889 | 0.0090  |
| 8  | 4                | 5                | 7   | 3                 | 4                 | 9  | 8   | 11721.0318 | -0.0048 |
|    |                  |                  |     |                   |                   | 8  | 7   | 11721.0318 | 0.0719  |
|    |                  |                  |     |                   |                   | 7  | 8   | 11721.0318 | 0.0152  |
| 8  | 4                | 4                | 7   | 3                 | 4                 | 7  | 6   | 11727.4988 | -0.0208 |
|    |                  |                  |     |                   |                   | 8  | 7   | 11727.4988 | 0.0727  |
|    |                  |                  |     |                   |                   | 9  | 8   | 11727.4988 | -0.0065 |

| J' | K <sub>a</sub> ' | K <sub>c</sub> ' | J'' | K <sub>a</sub> '' | K <sub>c</sub> '' | F' | F'' | Obs        | Res     |
|----|------------------|------------------|-----|-------------------|-------------------|----|-----|------------|---------|
| 6  | 5                | 2                | 5   | 4                 | 1                 | 7  | 6   | 11737.9623 | 0.0025  |
|    |                  |                  |     |                   |                   | 6  | 5   | 11737.9623 | 0.1055  |
|    |                  |                  |     |                   |                   | 5  | 4   | 11737.9623 | -0.0032 |
| 8  | 4                | 5                | 7   | 3                 | 5                 | 8  | 7   | 11786.1493 | -0.0043 |
|    |                  |                  |     |                   |                   | 9  | 8   | 11786.2796 | 0.0249  |
|    |                  |                  |     |                   |                   | 7  | 6   | 11786.2796 | 0.0074  |
| 8  | 4                | 4                | 7   | 3                 | 5                 | 8  | 7   | 11792.6148 | -0.0049 |
|    |                  |                  |     |                   |                   | 9  | 8   | 11792.7468 | 0.0236  |
|    |                  |                  |     |                   |                   | 7  | 6   | 11792.7468 | 0.0057  |
| 7  | 5                | 3                | 6   | 4                 | 2                 | 7  | 6   | 12530.5284 | -0.0284 |
|    |                  |                  |     |                   |                   | 8  | 7   | 12530.6311 | -0.0314 |
|    |                  |                  |     |                   |                   | 6  | 5   | 12530.6311 | -0.0444 |
| 7  | 5                | 2                | 6   | 4                 | 3                 | 7  | 6   | 12531.1905 | 0.0035  |
|    |                  |                  |     |                   |                   | 8  | 7   | 12531.3167 | 0.0236  |
|    |                  |                  |     |                   |                   | 6  | 5   | 12531.3167 | 0.0106  |
| 8  | 5                | 4                | 7   | 4                 | 3                 | 8  | 7   | 13321.0594 | -0.0150 |
|    |                  |                  |     |                   |                   | 7  | 6   | 13321.1628 | -0.0221 |
|    |                  |                  |     |                   |                   | 9  | 8   | 13321.1628 | -0.0088 |
| 8  | 5                | 3                | 7   | 4                 | 4                 | 8  | 7   | 13323.3645 | -0.0275 |
|    |                  |                  |     |                   |                   | 7  | 6   | 13323.4911 | -0.0126 |
|    |                  |                  |     |                   |                   | 9  | 8   | 13323.4911 | 0.0007  |

**Table S5.** Observed frequencies and residuals (MHz) for  $+sc/-ac/+sc$  3 for  $J_{K_a K_c}' \leftarrow J_{K_a K_c}''$  and  $F' \leftarrow F''$  transitions.

| $J'$ | $K_a'$ | $K_c'$ | $J''$ | $K_a''$ | $K_c''$ | $F'$ | $F''$ | Obs       | Res     | $J'$ | $K_a'$ | $K_c'$ | $J''$ | $K_a''$ | $K_c''$ | $F'$ | $F''$ | Obs       | Res     | $J'$ | $K_a'$ | $K_c'$ | $J''$ | $K_a''$ | $K_c''$ | $F'$ | $F''$ | Obs       | Res       |         |
|------|--------|--------|-------|---------|---------|------|-------|-----------|---------|------|--------|--------|-------|---------|---------|------|-------|-----------|---------|------|--------|--------|-------|---------|---------|------|-------|-----------|-----------|---------|
| 6    | 2      | 4      | 5     | 1       | 4       | 5    | 4     | 7019.1823 | 0.0111  |      |        |        |       |         |         | 11   | 10    | 7971.1690 | 0.0077  |      |        |        |       |         |         | 6    | 5     | 8828.1072 | 0.0040    |         |
|      |        |        |       |         |         | 7    | 6     | 7019.1823 | -0.0085 | 8    | 2      | 7      | 7     | 1       | 6       | 9    | 8     | 8016.8051 | -0.0082 |      | 10     | 2      | 9     | 9       | 1       | 8    | 11    | 10        | 9087.4705 | 0.0292  |
|      |        |        |       |         |         | 6    | 5     | 7019.3304 | 0.0066  |      |        |        |       |         |         | 7    | 6     | 8016.8051 | 0.0445  |      |        |        |       |         |         | 10   | 9     | 9087.8741 | 0.0025    |         |
| 10   | 1      | 10     | 9     | 0       | 9       | 9    | 8     | 7334.7758 | -0.0059 |      |        |        |       |         |         | 8    | 7     | 8017.2565 | -0.0003 |      | 6      | 3      | 4     | 5       | 2       | 3    | 5     | 4         | 9090.2098 | -0.0060 |
|      |        |        |       |         |         | 11   | 10    | 7334.7758 | -0.0098 | 5    | 3      | 2      | 4     | 2       | 2       | 5    | 4     | 8376.9805 | -0.0049 |      |        |        |       |         |         | 7    | 6     | 9090.2098 | 0.0029    |         |
|      |        |        |       |         |         | 10   | 9     | 7334.9513 | -0.0044 |      |        |        |       |         |         | 4    | 3     | 8377.1038 | -0.0132 |      |        |        |       |         |         | 6    | 5     | 9090.2098 | 0.0151    |         |
| 7    | 2      | 6      | 6     | 1       | 5       | 6    | 5     | 7453.3991 | 0.0414  |      |        |        |       |         |         | 6    | 5     | 8377.1038 | 0.0146  |      | 6      | 3      | 3     | 5       | 2       | 3    | 5     | 4         | 9095.2121 | 0.0061  |
|      |        |        |       |         |         | 8    | 7     | 7453.3991 | -0.0182 | 12   | 0      | 12     | 11    | 1       | 11      | 13   | 12    | 8394.3640 | 0.0206  |      |        |        |       |         |         | 7    | 6     | 9095.2121 | 0.0174    |         |
|      |        |        |       |         |         | 7    | 6     | 7453.8583 | 0.0065  |      |        |        |       |         |         | 11   | 10    | 8394.3640 | 0.0082  |      |        |        |       |         |         | 6    | 5     | 9095.2121 | 0.0437    |         |
| 4    | 3      | 2      | 3     | 2       | 1       | 4    | 3     | 7645.8035 | 0.0057  |      |        |        |       |         |         | 12   | 11    | 8394.3640 | 0.0427  |      | 13     | 0      | 13    | 12      | 1       | 12   | 14    | 13        | 9116.1606 | -0.0113 |
|      |        |        |       |         |         | 3    | 2     | 7645.9537 | -0.0511 | 5    | 3      | 3      | 4     | 2       | 3       | 5    | 4     | 8408.6986 | 0.0047  |      |        |        |       |         |         | 13   | 12    | 9116.1606 | -0.0030   |         |
|      |        |        |       |         |         | 5    | 4     | 7645.9537 | -0.0141 |      |        |        |       |         |         | 6    | 5     | 8408.9394 | 0.0185  |      |        |        |       |         |         | 12   | 11    | 9116.1606 | -0.0210   |         |
| 4    | 3      | 1      | 3     | 2       | 1       | 4    | 3     | 7646.2234 | 0.0098  |      |        |        |       |         |         | 4    | 3     | 8408.9394 | -0.0417 |      | 6      | 3      | 4     | 5       | 2       | 4    | 6     | 5         | 9167.3095 | 0.0001  |
|      |        |        |       |         |         | 5    | 4     | 7646.3742 | -0.0118 | 5    | 3      | 2      | 4     | 2       | 3       | 5    | 4     | 8410.3639 | 0.0078  |      |        |        |       |         |         | 7    | 6     | 9167.5344 | 0.0125    |         |
|      |        |        |       |         |         | 3    | 2     | 7646.3742 | -0.0494 |      |        |        |       |         |         | 4    | 3     | 8410.6104 | -0.0408 |      |        |        |       |         |         | 5    | 4     | 9167.5344 | -0.0371   |         |
| 4    | 3      | 1      | 3     | 2       | 2       | 4    | 3     | 7657.3885 | 0.0102  |      |        |        |       |         |         | 6    | 5     | 8410.6104 | 0.0208  |      | 6      | 3      | 3     | 5       | 2       | 4    | 6     | 5         | 9172.2825 | -0.0004 |
|      |        |        |       |         |         | 4    | 4     | 7657.3885 | 0.0100  | 8    | 2      | 6      | 7     | 1       | 6       | 9    | 8     | 8444.9634 | 0.0037  |      |        |        |       |         |         | 7    | 6     | 9172.5020 | -0.0076   |         |
|      |        |        |       |         |         | 5    | 4     | 7657.6437 | 0.0218  |      |        |        |       |         |         | 7    | 6     | 8444.9634 | 0.0006  |      |        |        |       |         |         | 5    | 4     | 9172.5020 | -0.0597   |         |
|      |        |        |       |         |         | 3    | 2     | 7657.6437 | -0.0407 |      |        |        |       |         |         | 8    | 7     | 8444.9634 | 0.0031  |      | 9      | 2      | 7     | 8       | 1       | 7    | 8     | 7         | 9203.0914 | -0.0211 |
| 11   | 0      | 11     | 10    | 1       | 10      | 10   | 9     | 7661.6013 | -0.0036 |      |        |        |       |         |         | 8    | 7     | 8560.2435 | 0.0602  |      |        |        |       |         |         | 9    | 8     | 9203.0914 | 0.0649    |         |
|      |        |        |       |         |         | 12   | 11    | 7661.6013 | 0.0126  |      |        |        |       |         |         | 10   | 9     | 8560.2435 | 0.0139  |      |        |        |       |         |         | 10   | 9     | 9203.0914 | -0.0096   |         |
|      |        |        |       |         |         | 11   | 10    | 7661.6013 | 0.0545  |      |        |        |       |         |         | 9    | 8     | 8560.6692 | -0.0022 |      | 13     | 1      | 13    | 12      | 0       | 12   | 12    | 11        | 9276.3505 | 0.0084  |
| 7    | 2      | 5      | 6     | 1       | 5       | 6    | 5     | 7719.7079 | 0.0167  |      |        |        |       |         |         | 7    | 6     | 8561.0019 | -0.0054 |      |        |        |       |         |         | 13   | 12    | 9276.3505 | -0.0645   |         |
|      |        |        |       |         |         | 8    | 7     | 7719.7079 | 0.0094  |      |        |        |       |         |         | 8    | 7     | 8561.6424 | -0.0052 |      |        |        |       |         |         | 14   | 13    | 9276.3505 | 0.0113    |         |
|      |        |        |       |         |         | 7    | 6     | 7719.7079 | -0.0626 |      |        |        |       |         |         | 6    | 5     | 8561.7837 | 0.0140  |      | 14     | 1      | 13    | 13      | 2       | 12   | 14    | 13        | 9521.4838 | 0.0074  |
| 6    | 2      | 4      | 5     | 1       | 5       | 6    | 5     | 7811.8049 | -0.0126 |      |        |        |       |         |         | 13   | 12    | 8632.8084 | 0.0265  |      |        |        |       |         |         | 13   | 12    | 9521.6840 | 0.0054    |         |
|      |        |        |       |         |         | 7    | 6     | 7812.7570 | 0.0018  |      |        |        |       |         |         | 12   | 11    | 8633.0313 | 0.0001  |      |        |        |       |         |         | 15   | 14    | 9521.6840 | 0.0232    |         |
|      |        |        |       |         |         | 5    | 4     | 7812.9579 | 0.0042  |      |        |        |       |         |         | 14   | 13    | 8633.0313 | 0.0227  |      | 11     | 2      | 10    | 10      | 1       | 9    | 12    | 11        | 9603.3568 | 0.0085  |
| 11   | 1      | 11     | 10    | 0       | 10      | 10   | 9     | 7971.0229 | -0.0068 |      |        |        |       |         |         | 7    | 6     | 8826.9133 | -0.0128 |      |        |        |       |         |         | 11   | 10    | 9603.7453 | -0.0128   |         |
|      |        |        |       |         |         | 12   | 11    | 7971.0229 | -0.0073 |      |        |        |       |         |         | 8    | 7     | 8827.9281 | -0.0008 |      | 7      | 3      | 5     | 6       | 2       | 4    | 7     | 6         | 9783.7215 | -0.0526 |

| J  | K <sub>a</sub> | K <sub>c</sub> | J'' | K <sub>a</sub> '' | K <sub>c</sub> '' | F' | F'' | Obs        | Res     |
|----|----------------|----------------|-----|-------------------|-------------------|----|-----|------------|---------|
|    |                |                |     |                   |                   | 6  | 5   | 9783.7215  | 0.0249  |
|    |                |                |     |                   |                   | 8  | 7   | 9783.7215  | 0.0196  |
| 7  | 3              | 4              | 6   | 2                 | 4                 | 7  | 6   | 9796.0879  | -0.0587 |
|    |                |                |     |                   |                   | 6  | 5   | 9796.0879  | -0.0113 |
|    |                |                |     |                   |                   | 8  | 7   | 9796.0879  | -0.0128 |
| 14 | 0              | 14             | 13  | 1                 | 13                | 13 | 12  | 9829.3846  | 0.0014  |
|    |                |                |     |                   |                   | 15 | 14  | 9829.3846  | 0.0093  |
|    |                |                |     |                   |                   | 14 | 13  | 9829.3846  | 0.0085  |
| 8  | 2              | 6              | 7   | 1                 | 7                 | 8  | 7   | 9915.6854  | 0.0006  |
|    |                |                |     |                   |                   | 9  | 8   | 9916.7629  | 0.0069  |
|    |                |                |     |                   |                   | 7  | 6   | 9916.8949  | -0.0187 |
| 14 | 1              | 14             | 13  | 0                 | 13                | 15 | 14  | 9942.3091  | 0.0023  |
|    |                |                |     |                   |                   | 13 | 12  | 9942.3091  | -0.0011 |
|    |                |                |     |                   |                   | 14 | 13  | 9942.3091  | -0.0557 |
| 7  | 3              | 4              | 6   | 2                 | 5                 | 7  | 6   | 9947.7583  | -0.0011 |
|    |                |                |     |                   |                   | 8  | 7   | 9947.9781  | -0.0150 |
| 12 | 2              | 11             | 11  | 1                 | 10                | 13 | 12  | 10113.8936 | -0.0077 |
|    |                |                |     |                   |                   | 11 | 10  | 10113.8936 | 0.0211  |
| 5  | 4              | 2              | 4   | 3                 | 1                 | 5  | 4   | 10266.8130 | 0.0047  |
|    |                |                |     |                   |                   | 6  | 5   | 10266.9817 | 0.0174  |
|    |                |                |     |                   |                   | 4  | 3   | 10266.9817 | -0.0012 |
| 5  | 4              | 1              | 4   | 3                 | 2                 | 5  | 4   | 10267.2355 | -0.0003 |
|    |                |                |     |                   |                   | 6  | 5   | 10267.4059 | 0.0116  |
|    |                |                |     |                   |                   | 4  | 3   | 10267.4059 | -0.0076 |
| 7  | 6              | 1              | 7   | 5                 | 2                 | 7  | 7   | 10288.7982 | 0.0042  |
|    |                |                |     |                   |                   | 8  | 8   | 10289.1366 | -0.0296 |
|    |                |                |     |                   |                   | 6  | 6   | 10289.2461 | 0.0261  |
| 6  | 6              | 0              | 6   | 5                 | 1                 | 6  | 6   | 10290.4027 | 0.0020  |
|    |                |                |     |                   |                   | 7  | 7   | 10290.9468 | 0.0506  |
|    |                |                |     |                   |                   | 5  | 5   | 10290.9468 | -0.0329 |

| J  | K <sub>a</sub> | K <sub>c</sub> | J'' | K <sub>a</sub> '' | K <sub>c</sub> '' | F' | F'' | Obs        | Res     |
|----|----------------|----------------|-----|-------------------|-------------------|----|-----|------------|---------|
| 9  | 2              | 8              | 8   | 1                 | 8                 | 9  | 8   | 10440.7085 | -0.0159 |
|    |                |                |     |                   |                   | 8  | 7   | 10441.3764 | -0.0540 |
|    |                |                |     |                   |                   | 10 | 9   | 10441.3764 | 0.0332  |
| 8  | 3              | 6              | 7   | 2                 | 5                 | 9  | 8   | 10449.5572 | -0.0089 |
|    |                |                |     |                   |                   | 7  | 6   | 10449.5572 | 0.0063  |
|    |                |                |     |                   |                   | 8  | 7   | 10449.7195 | 0.0015  |
| 8  | 3              | 5              | 7   | 2                 | 5                 | 7  | 6   | 10476.6073 | 0.0030  |
|    |                |                |     |                   |                   | 9  | 8   | 10476.6073 | -0.0069 |
|    |                |                |     |                   |                   | 8  | 7   | 10476.7276 | 0.0062  |
| 15 | 0              | 15             | 14  | 1                 | 14                | 16 | 15  | 10536.0036 | 0.0112  |
|    |                |                |     |                   |                   | 15 | 14  | 10536.0036 | 0.0046  |
|    |                |                |     |                   |                   | 14 | 13  | 10536.0036 | 0.0047  |
| 15 | 1              | 15             | 14  | 0                 | 14                | 16 | 15  | 10614.7612 | -0.0204 |
|    |                |                |     |                   |                   | 14 | 13  | 10614.7612 | -0.0242 |
|    |                |                |     |                   |                   | 15 | 14  | 10614.8370 | 0.0103  |
| 8  | 3              | 6              | 7   | 2                 | 6                 | 8  | 7   | 10715.6325 | -0.0042 |
|    |                |                |     |                   |                   | 7  | 6   | 10715.8291 | -0.0552 |
|    |                |                |     |                   |                   | 9  | 8   | 10715.8291 | -0.0182 |
| 8  | 3              | 5              | 7   | 2                 | 6                 | 8  | 7   | 10742.6397 | -0.0003 |
|    |                |                |     |                   |                   | 9  | 8   | 10742.8707 | -0.0246 |
| 6  | 4              | 3              | 5   | 3                 | 2                 | 6  | 5   | 11008.9214 | -0.0006 |
|    |                |                |     |                   |                   | 5  | 4   | 11009.0580 | -0.0325 |
|    |                |                |     |                   |                   | 7  | 6   | 11009.0580 | -0.0075 |
| 6  | 4              | 2              | 5   | 3                 | 3                 | 6  | 5   | 11010.6502 | 0.0070  |
|    |                |                |     |                   |                   | 7  | 6   | 11010.8047 | 0.0113  |
|    |                |                |     |                   |                   | 5  | 4   | 11010.8047 | -0.0151 |
| 9  | 3              | 7              | 8   | 2                 | 6                 | 10 | 9   | 11082.8205 | -0.0129 |
|    |                |                |     |                   |                   | 8  | 7   | 11082.8205 | 0.0095  |
|    |                |                |     |                   |                   | 9  | 8   | 11083.0542 | -0.0025 |
| 9  | 3              | 6              | 8   | 2                 | 6                 | 10 | 9   | 11136.2620 | -0.0113 |

| J  | K <sub>a</sub> | K <sub>c</sub> | J'' | K <sub>a</sub> '' | K <sub>c</sub> '' | F' | F'' | Obs        | Res        |         |
|----|----------------|----------------|-----|-------------------|-------------------|----|-----|------------|------------|---------|
| 9  | 3              | 6              | 8   | 2                 | 6                 | 8  | 7   | 11136.2620 | 0.0033     |         |
|    |                |                |     |                   |                   | 9  | 8   | 11136.4239 | -0.0023    |         |
| 14 | 2              | 13             | 13  | 1                 | 12                | 15 | 14  | 11145.6768 | -0.0225    |         |
|    |                |                |     |                   |                   |    | 12  | 11145.6768 | -0.0038    |         |
|    |                |                |     |                   |                   |    | 13  | 11145.9724 | -0.0309    |         |
| 16 | 0              | 16             | 15  | 1                 | 15                | 16 | 15  | 11237.7103 | -0.0065    |         |
|    |                |                |     |                   |                   |    | 14  | 11237.7103 | -0.0021    |         |
|    |                |                |     |                   |                   |    | 16  | 11237.7103 | 0.0034     |         |
| 10 | 2              | 9              | 9   | 1                 | 9                 | 10 | 9   | 11418.5007 | 0.0005     |         |
|    |                |                |     |                   |                   | 11 | 10  | 11419.1387 | 0.0285     |         |
|    |                |                |     |                   |                   | 9  | 8   | 11419.1387 | -0.0476    |         |
| 9  | 3              | 6              | 8   | 2                 | 7                 | 9  | 8   | 11564.1284 | -0.0013    |         |
|    |                |                |     |                   |                   | 10 | 9   | 11564.3981 | -0.0217    |         |
| 7  | 4              | 4              | 6   | 3                 | 3                 | 7  | 6   | 11748.8368 | -0.0073    |         |
|    |                |                |     |                   |                   |    | 6   | 5          | 11748.9768 | -0.0053 |
|    |                |                |     |                   |                   |    | 8   | 7          | 11748.9768 | 0.0157  |
| 7  | 4              | 3              | 6   | 3                 | 4                 | 7  | 6   | 11754.0200 | -0.0135    |         |
|    |                |                |     |                   |                   |    | 8   | 7          | 11754.1776 | 0.0124  |
|    |                |                |     |                   |                   |    | 6   | 5          | 11754.1776 | -0.0111 |
| 5  | 5              | 1              | 4   | 4                 | 0                 | 6  | 5   | 12138.6670 | -0.0125    |         |
|    |                |                |     |                   |                   |    | 4   | 3          | 12138.6670 | 0.0192  |
|    |                |                |     |                   |                   |    | 5   | 4          | 12138.6670 | 0.0632  |
| 8  | 4              | 5              | 7   | 3                 | 4                 | 8  | 7   | 12484.8763 | 0.0783     |         |
|    |                |                |     |                   |                   |    | 7   | 6          | 12484.8763 | -0.0234 |
|    |                |                |     |                   |                   |    | 9   | 8          | 12484.8763 | -0.0079 |
| 8  | 4              | 4              | 7   | 3                 | 4                 | 8  | 7   | 12485.5285 | 0.0849     |         |
|    |                |                |     |                   |                   |    | 7   | 6          | 12485.5285 | -0.0185 |
|    |                |                |     |                   |                   |    | 9   | 8          | 12485.5285 | -0.0027 |
| 8  | 4              | 4              | 7   | 3                 | 5                 | 8  | 7   | 12497.8011 | -0.0150    |         |
|    |                |                |     |                   |                   |    | 7   | 6          | 12497.9377 | -0.0120 |

| J  | K <sub>a</sub> | K <sub>c</sub> | J'' | K <sub>a</sub> '' | K <sub>c</sub> '' | F' | F'' | Obs        | Res     |
|----|----------------|----------------|-----|-------------------|-------------------|----|-----|------------|---------|
|    |                |                |     |                   |                   | 9  | 8   | 12497.9377 | 0.0075  |
| 6  | 5              | 2              | 5   | 4                 | 1                 | 6  | 5   | 12882.0287 | 0.0001  |
|    |                |                |     |                   |                   | 7  | 6   | 12882.1694 | 0.0201  |
|    |                |                |     |                   |                   | 5  | 4   | 12882.1694 | 0.0137  |
| 9  | 4              | 6              | 8   | 3                 | 5                 | 8  | 7   | 13214.2707 | -0.0021 |
|    |                |                |     |                   |                   | 9  | 8   | 13214.2707 | 0.0614  |
|    |                |                |     |                   |                   | 10 | 9   | 13214.2707 | 0.0080  |
| 9  | 4              | 5              | 8   | 3                 | 5                 | 10 | 9   | 13215.9521 | 0.0138  |
|    |                |                |     |                   |                   | 8  | 7   | 13215.9521 | 0.0032  |
|    |                |                |     |                   |                   | 9  | 8   | 13215.9521 | 0.0702  |
| 9  | 4              | 6              | 8   | 3                 | 6                 | 10 | 9   | 13241.3201 | 0.0094  |
|    |                |                |     |                   |                   | 8  | 7   | 13241.3201 | -0.0062 |
|    |                |                |     |                   |                   | 9  | 8   | 13241.3201 | 0.1074  |
| 9  | 4              | 5              | 8   | 3                 | 6                 | 9  | 8   | 13242.9891 | 0.1038  |
|    |                |                |     |                   |                   | 8  | 7   | 13242.9891 | -0.0132 |
|    |                |                |     |                   |                   | 10 | 9   | 13242.9891 | 0.0027  |
| 7  | 5              | 3              | 6   | 4                 | 2                 | 7  | 6   | 13625.1576 | -0.0163 |
|    |                |                |     |                   |                   | 8  | 7   | 13625.2859 | -0.0113 |
|    |                |                |     |                   |                   | 6  | 5   | 13625.2859 | -0.0261 |
| 10 | 4              | 7              | 9   | 3                 | 6                 | 9  | 8   | 13933.5421 | -0.0154 |
|    |                |                |     |                   |                   | 11 | 10  | 13933.5421 | -0.0100 |
|    |                |                |     |                   |                   | 10 | 9   | 13933.5421 | 0.0077  |
| 10 | 4              | 6              | 9   | 3                 | 6                 | 10 | 9   | 13937.4342 | 0.0172  |
|    |                |                |     |                   |                   | 9  | 8   | 13937.4342 | -0.0122 |
|    |                |                |     |                   |                   | 11 | 10  | 13937.4342 | -0.0062 |
| 10 | 4              | 6              | 9   | 3                 | 7                 | 9  | 8   | 13990.8426 | -0.0516 |
|    |                |                |     |                   |                   | 11 | 10  | 13990.8426 | -0.0377 |
|    |                |                |     |                   |                   | 10 | 9   | 13990.8426 | 0.0562  |
| 4  | 3              | 2              | 3   | 2                 | 2                 | 4  | 3   | 7656.9696  | 0.0071  |
|    |                |                |     |                   |                   | 5  | 4   | 7657.2287  | 0.0250  |

| J  | K <sub>a</sub> | K <sub>c</sub> | J'' | K <sub>a</sub> '' | K <sub>c</sub> '' | F' | F'' | Obs       | Res     |
|----|----------------|----------------|-----|-------------------|-------------------|----|-----|-----------|---------|
|    |                |                |     |                   |                   | 3  | 3   | 7657.2287 | -0.0370 |
| 6  | 2              | 5              | 5   | 1                 | 5                 | 6  | 5   | 7660.1949 | -0.0099 |
| 12 | 5              | 8              | 12  | 4                 | 9                 | 11 | 11  | 8371.2640 | -0.0266 |
|    |                |                |     |                   |                   | 13 | 13  | 8371.2640 | -0.0188 |
|    |                |                |     |                   |                   | 12 | 12  | 8371.2640 | 0.0714  |
| 5  | 3              | 3              | 4   | 2                 | 2                 | 5  | 4   | 8375.3286 | 0.0053  |
|    |                |                |     |                   |                   | 6  | 5   | 8375.4261 | 0.0056  |
|    |                |                |     |                   |                   | 4  | 3   | 8375.4261 | -0.0209 |
| 4  | 4              | 1              | 3   | 3                 | 0                 | 4  | 3   | 9523.7176 | 0.0297  |
|    |                |                |     |                   |                   | 3  | 2   | 9523.7176 | -0.0352 |
|    |                |                |     |                   |                   | 5  | 4   | 9523.7176 | -0.0792 |
| 4  | 4              | 0              | 3   | 3                 | 1                 | 5  | 4   | 9523.8739 | 0.0158  |
|    |                |                |     |                   |                   | 3  | 2   | 9523.8739 | 0.0596  |
|    |                |                |     |                   |                   | 4  | 3   | 9523.7176 | -0.0308 |
| 4  | 4              | 1              | 3   | 3                 | 1                 | 4  | 3   | 9523.7176 | -0.0295 |
|    |                |                |     |                   |                   | 3  | 2   | 9523.8739 | 0.0609  |
|    |                |                |     |                   |                   | 5  | 4   | 9523.8739 | 0.0171  |
| 4  | 4              | 0              | 3   | 3                 | 0                 | 4  | 3   | 9523.7176 | 0.0284  |
|    |                |                |     |                   |                   | 3  | 2   | 9523.7176 | -0.0365 |
| 12 | 1              | 12             | 11  | 0                 | 11                | 13 | 12  | 8618.6531 | -0.0061 |
|    |                |                |     |                   |                   | 11 | 10  | 8618.6531 | -0.0077 |

**Table S6.** Observed frequencies and residuals (MHz) for  $+ac/+ac/-sc$  4 for  $J'_{K'_a K'_c} \leftarrow J''_{K''_a K''_c}$  and  $F' \leftarrow F''$  transitions.

| $J'$ | $K'_a$ | $K'_c$ | $J''$ | $K''_a$ | $K''_c$ | $F'$ | $F''$ | Obs       | Res     | $J'$ | $K'_a$ | $K'_c$ | $J''$ | $K''_a$ | $K''_c$ | $F'$ | $F''$ | Obs       | Res     | $J'$ | $K'_a$ | $K'_c$ | $J''$ | $K''_a$ | $K''_c$ | $F'$ | $F''$ | Obs       | Res     |
|------|--------|--------|-------|---------|---------|------|-------|-----------|---------|------|--------|--------|-------|---------|---------|------|-------|-----------|---------|------|--------|--------|-------|---------|---------|------|-------|-----------|---------|
| 7    | 2      | 6      | 6     | 1       | 5       | 8    | 7     | 7050.2332 | -0.0081 |      |        |        |       |         |         | 4    | 3     | 7687.5244 | -0.0292 | 6    | 3      | 4      | 5     | 2       | 3       | 6    | 5     | 8344.0585 | 0.0580  |
|      |        |        |       |         |         | 6    | 5     | 7050.2332 | 0.0058  | 5    | 3      | 2      | 4     | 2       | 3       | 5    | 4     | 7694.6308 | 0.0058  |      |        |        |       |         |         | 5    | 4     | 8344.0585 | -0.0062 |
|      |        |        |       |         |         | 7    | 6     | 7050.4079 | -0.0011 |      |        |        |       |         |         | 4    | 3     | 7694.9007 | -0.0301 |      |        |        |       |         |         | 7    | 6     | 8344.0585 | 0.0107  |
| 10   | 1      | 9      | 9     | 2       | 8       | 10   | 9     | 7293.6257 | 0.0353  |      |        |        |       |         |         | 6    | 5     | 7694.9007 | 0.0337  | 6    | 3      | 3      | 5     | 2       | 3       | 5    | 4     | 8365.9089 | -0.0349 |
|      |        |        |       |         |         | 11   | 10    | 7293.6257 | -0.0209 | 18   | 4      | 15     | 17    | 5       | 12      | 17   | 16    | 7903.0844 | 0.0046  |      |        |        |       |         |         | 7    | 6     | 8365.9089 | -0.0143 |
| 10   | 0      | 10     | 9     | 1       | 9       | 9    | 8     | 7500.1466 | -0.0108 |      |        |        |       |         |         | 19   | 18    | 7903.0844 | -0.0022 |      |        |        |       |         |         | 6    | 5     | 8365.9089 | 0.0539  |
|      |        |        |       |         |         | 11   | 10    | 7500.1466 | 0.0000  | 6    | 2      | 4      | 5     | 1       | 5       | 6    | 5     | 7904.227  | 0.0053  | 6    | 3      | 4      | 5     | 2       | 4       | 6    | 5     | 8528.6285 | 0.0033  |
|      |        |        |       |         |         | 10   | 9     | 7500.1466 | -0.0108 |      |        |        |       |         |         | 7    | 6     | 7904.86   | 0.0140  |      |        |        |       |         |         | 7    | 6     | 8528.8434 | 0.0071  |
| 6    | 2      | 5      | 5     | 1       | 5       | 6    | 5     | 7552.3151 | -0.0048 |      |        |        |       |         |         | 5    | 4     | 7905.0109 | 0.0273  |      |        |        |       |         |         | 5    | 4     | 8528.8434 | -0.0431 |
|      |        |        |       |         |         | 7    | 6     | 7552.7333 | 0.0064  | 7    | 6      | 1      | 7     | 5       | 2       | 7    | 7     | 7961.8129 | -0.0163 | 8    | 2      | 6      | 7     | 1       | 6       | 8    | 7     | 8534.1607 | 0.0034  |
|      |        |        |       |         |         | 5    | 4     | 7552.8366 | 0.0087  |      |        |        |       |         |         | 6    | 6     | 7962.2366 | -0.0486 |      |        |        |       |         |         | 9    | 8     | 8534.2795 | -0.0083 |
| 7    | 1      | 6      | 6     | 0       | 6       | 8    | 7     | 7558.6325 | 0.0355  |      |        |        |       |         |         | 8    | 8     | 7962.2366 | 0.0088  |      |        |        |       |         |         | 7    | 6     | 8534.2795 | -0.0333 |
|      |        |        |       |         |         | 6    | 5     | 7558.6325 | -0.0497 | 6    | 6      | 0      | 6     | 5       | 1       | 6    | 6     | 7965.9364 | -0.0067 | 6    | 3      | 3      | 5     | 2       | 4       | 6    | 5     | 8550.4848 | 0.0051  |
| 5    | 3      | 3      | 4     | 2       | 2       | 5    | 4     | 7605.6407 | 0.0039  |      |        |        |       |         |         | 7    | 7     | 7966.4939 | 0.0207  |      |        |        |       |         |         | 5    | 4     | 8550.7331 | -0.0325 |
|      |        |        |       |         |         | 6    | 5     | 7605.7523 | -0.0067 |      |        |        |       |         |         | 5    | 5     | 7966.4939 | -0.0687 |      |        |        |       |         |         | 7    | 6     | 8550.7331 | 0.0213  |
|      |        |        |       |         |         | 4    | 3     | 7605.7523 | -0.0403 | 9    | 2      | 8      | 8     | 1       | 7       | 10   | 9     | 8178.5058 | -0.0107 | 7    | 2      | 6      | 6     | 1       | 6       | 7    | 6     | 8572.9708 | 0.0022  |
| 10   | 1      | 10     | 9     | 0       | 9       | 11   | 10    | 7609.4834 | -0.0225 |      |        |        |       |         |         | 8    | 7     | 8178.5058 | 0.0006  |      |        |        |       |         |         | 8    | 7     | 8573.3636 | 0.0122  |
|      |        |        |       |         |         | 10   | 9     | 7609.4834 | -0.0639 |      |        |        |       |         |         | 9    | 8     | 8178.6817 | -0.0023 |      |        |        |       |         |         | 6    | 5     | 8573.3636 | -0.0668 |
|      |        |        |       |         |         | 9    | 8     | 7609.4834 | -0.0301 | 11   | 0      | 11     | 10    | 1       | 10      | 12   | 11    | 8252.0744 | 0.0041  | 14   | 2      | 12     | 13    | 3       | 10      | 14   | 13    | 8721.2261 | -0.0064 |
| 5    | 3      | 2      | 4     | 2       | 2       | 5    | 4     | 7613.007  | 0.0050  |      |        |        |       |         |         | 10   | 9     | 8252.0744 | -0.0046 | 10   | 2      | 9      | 9     | 1       | 8       | 11   | 10    | 8734.5978 | -0.0086 |
|      |        |        |       |         |         | 6    | 5     | 7613.1221 | -0.0121 |      |        |        |       |         |         | 11   | 10    | 8252.0744 | -0.0087 |      |        |        |       |         |         | 9    | 8     | 8734.5978 | 0.0002  |
|      |        |        |       |         |         | 4    | 3     | 7613.1221 | -0.0477 | 4    | 4      | 1      | 3     | 3       | 0       | 3    | 2     | 8299.0663 | -0.0511 |      |        |        |       |         |         | 10   | 9     | 8734.7622 | 0.0031  |
| 8    | 2      | 7      | 7     | 1       | 6       | 9    | 8     | 7621.0254 | -0.0100 |      |        |        |       |         |         | 4    | 3     | 8299.0663 | 0.0185  | 12   | 0      | 12     | 11    | 1       | 11      | 11   | 10    | 8996.5061 | -0.0003 |
|      |        |        |       |         |         | 7    | 6     | 7621.0254 | 0.0032  |      |        |        |       |         |         | 5    | 4     | 8299.1995 | 0.0353  |      |        |        |       |         |         | 13   | 12    | 8996.5061 | 0.0070  |
|      |        |        |       |         |         | 8    | 7     | 7621.206  | -0.0026 | 4    | 4      | 0      | 3     | 3       | 1       | 3    | 2     | 8299.3443 | -0.0500 |      |        |        |       |         |         | 12   | 11    | 8996.5061 | -0.0063 |
| 7    | 2      | 5      | 6     | 1       | 5       | 7    | 6     | 7643.8373 | -0.0076 |      |        |        |       |         |         | 4    | 3     | 8299.3443 | 0.0209  | 12   | 1      | 12     | 11    | 0       | 11      | 12   | 11    | 9037.9663 | -0.0148 |
|      |        |        |       |         |         | 8    | 7     | 7643.9586 | 0.0164  |      |        |        |       |         |         | 5    | 4     | 8299.4756 | 0.0349  |      |        |        |       |         |         | 11   | 10    | 9037.9663 | 0.0028  |
|      |        |        |       |         |         | 6    | 5     | 7643.9586 | -0.0078 | 11   | 1      | 11     | 10    | 0       | 10      | 12   | 11    | 8319.9826 | -0.0006 |      |        |        |       |         |         | 13   | 12    | 9037.9663 | 0.0091  |
| 5    | 3      | 3      | 4     | 2       | 3       | 5    | 4     | 7687.2702 | 0.0104  |      |        |        |       |         |         | 11   | 10    | 8319.9826 | -0.0317 | 7    | 3      | 5      | 6     | 2       | 4       | 6    | 5     | 9038.2264 | 0.0057  |
|      |        |        |       |         |         | 4    | 5     | 7687.5244 | 0.0407  |      |        |        |       |         |         | 10   | 9     | 8319.9826 | -0.0076 |      |        |        |       |         |         | 8    | 7     | 9038.2264 | 0.0103  |

| J  | K <sub>a</sub> | K <sub>c</sub> | J  | K <sub>a</sub> | K <sub>c</sub> | F  | F  | Obs       | Res     | J  | K <sub>a</sub> | K <sub>c</sub> | J  | K <sub>a</sub> | K <sub>c</sub> | F  | F  | Obs        | Res     | J  | K <sub>a</sub> | K <sub>c</sub> | J  | K <sub>a</sub> | K <sub>c</sub> | F  | F  | Obs        | Res     |
|----|----------------|----------------|----|----------------|----------------|----|----|-----------|---------|----|----------------|----------------|----|----------------|----------------|----|----|------------|---------|----|----------------|----------------|----|----------------|----------------|----|----|------------|---------|
|    |                |                |    |                |                | 7  | 6  | 9038.2264 | -0.0090 |    |                |                |    |                |                | 14 | 13 | 9736.0284  | 0.0216  |    |                |                |    |                |                | 9  | 8  | 10278.0021 | 0.0073  |
| 7  | 3              | 4              | 6  | 2              | 4              | 6  | 5  | 9091.9146 | -0.0014 | 13 | 1              | 13             | 12 | 0              | 12             | 14 | 13 | 9760.985   | 0.0183  | 8  | 3              | 5              | 7  | 2              | 6              | 8  | 7  | 10391.0534 | 0.0029  |
|    |                |                |    |                |                | 7  | 6  | 9091.9146 | 0.0278  |    |                |                |    |                |                | 12 | 11 | 9760.985   | 0.0126  |    |                |                |    |                |                | 9  | 8  | 10391.2825 | -0.0230 |
|    |                |                |    |                |                | 8  | 7  | 9091.9146 | 0.0086  |    |                |                |    |                |                | 13 | 12 | 9760.985   | -0.0007 |    |                |                |    |                |                | 7  | 6  | 10391.2825 | -0.0659 |
| 5  | 4              | 2              | 4  | 3              | 1              | 5  | 4  | 9104.5555 | 0.0081  | 8  | 3              | 5              | 7  | 2              | 5              | 8  | 7  | 9797.6115  | -0.0029 | 14 | 0              | 14             | 13 | 1              | 13             | 13 | 12 | 10472.3964 | 0.0162  |
|    |                |                |    |                |                | 4  | 3  | 9104.7365 | 0.0023  |    |                |                |    |                |                | 9  | 8  | 9797.6115  | 0.0067  |    |                |                |    |                |                | 15 | 14 | 10472.3964 | 0.0217  |
|    |                |                |    |                |                | 6  | 5  | 9104.7365 | 0.0225  |    |                |                |    |                |                | 7  | 6  | 9797.6115  | 0.0021  |    |                |                |    |                |                | 14 | 13 | 10472.3964 | 0.0094  |
| 5  | 4              | 1              | 4  | 3              | 2              | 5  | 4  | 9106.5083 | 0.0146  | 12 | 2              | 11             | 11 | 1              | 10             | 13 | 12 | 9890.1848  | -0.0052 | 14 | 1              | 14             | 13 | 0              | 13             | 14 | 13 | 10487.2524 | 0.0059  |
|    |                |                |    |                |                | 4  | 3  | 9106.6757 | -0.0096 |    |                |                |    |                |                | 11 | 10 | 9890.1848  | -0.0014 |    |                |                |    |                |                | 15 | 14 | 10487.2524 | 0.0216  |
|    |                |                |    |                |                | 6  | 5  | 9106.6757 | 0.0115  |    |                |                |    |                |                | 12 | 11 | 9890.3108  | 0.0122  |    |                |                |    |                |                | 13 | 12 | 10487.2524 | 0.0165  |
| 12 | 1              | 11             | 11 | 2              | 10             | 12 | 11 | 9111.7313 | 0.0130  | 6  | 4              | 3              | 5  | 3              | 2              | 6  | 5  | 9906.498   | 0.0034  | 9  | 3              | 6              | 8  | 2              | 6              | 10 | 9  | 10498.1744 | 0.0080  |
|    |                |                |    |                |                | 13 | 12 | 9111.7313 | -0.0094 |    |                |                |    |                |                | 7  | 6  | 9906.6642  | 0.0168  |    |                |                |    |                |                | 8  | 7  | 10498.1744 | 0.0053  |
|    |                |                |    |                |                | 11 | 10 | 9111.7313 | -0.0171 |    |                |                |    |                |                | 5  | 4  | 9906.6642  | -0.0100 |    |                |                |    |                |                | 9  | 8  | 10498.1744 | -0.0101 |
| 11 | 2              | 10             | 10 | 1              | 9              | 10 | 9  | 9301.7373 | -0.0044 | 6  | 4              | 2              | 5  | 3              | 2              | 6  | 5  | 9906.9728  | 0.0093  | 13 | 2              | 12             | 12 | 1              | 11             | 12 | 11 | 10505.6573 | 0.0196  |
|    |                |                |    |                |                | 12 | 11 | 9301.7373 | -0.0107 |    |                |                |    |                |                | 7  | 6  | 9907.1321  | 0.0151  |    |                |                |    |                |                | 14 | 13 | 10505.6573 | 0.0178  |
|    |                |                |    |                |                | 11 | 10 | 9301.8775 | -0.0023 |    |                |                |    |                |                | 5  | 4  | 9907.1321  | -0.0118 | 5  | 5              | 1              | 4  | 4              | 0              | 5  | 4  | 10555.2329 | 0.0423  |
| 7  | 3              | 4              | 6  | 2              | 5              | 7  | 6  | 9443.7932 | 0.0047  | 6  | 4              | 3              | 5  | 3              | 3              | 6  | 5  | 9913.8666  | 0.0068  |    |                |                |    |                |                | 6  | 5  | 10555.2329 | -0.0387 |
|    |                |                |    |                |                | 6  | 5  | 9444.021  | -0.0508 |    |                |                |    |                |                | 5  | 4  | 9914.0451  | -0.0063 |    |                |                |    |                |                | 4  | 3  | 10555.2329 | -0.0049 |
|    |                |                |    |                |                | 8  | 7  | 9444.021  | -0.0039 |    |                |                |    |                |                | 7  | 6  | 9914.0451  | 0.0225  | 5  | 5              | 0              | 4  | 4              | 1              | 5  | 4  | 10555.2329 | 0.0314  |
| 9  | 2              | 7              | 8  | 1              | 7              | 9  | 8  | 9487.6089 | 0.0030  | 6  | 4              | 2              | 5  | 3              | 3              | 6  | 5  | 9914.332   | 0.0032  |    |                |                |    |                |                | 6  | 5  | 10555.2329 | -0.0496 |
|    |                |                |    |                |                | 8  | 7  | 9487.7872 | -0.0103 |    |                |                |    |                |                | 5  | 4  | 9914.4966  | -0.0245 |    |                |                |    |                |                | 4  | 3  | 10555.2329 | -0.0158 |
|    |                |                |    |                |                | 10 | 9  | 9487.7872 | 0.0155  |    |                |                |    |                |                | 7  | 6  | 9914.4966  | 0.0044  | 7  | 4              | 4              | 6  | 3              | 3              | 7  | 6  | 10700.6791 | -0.0037 |
| 8  | 2              | 7              | 7  | 1              | 7              | 8  | 7  | 9626.8838 | -0.0091 | 13 | 1              | 12             | 12 | 2              | 11             | 14 | 13 | 9963.5148  | -0.0113 |    |                |                |    |                |                | 8  | 7  | 10700.8185 | 0.0123  |
|    |                |                |    |                |                | 9  | 8  | 9627.3049 | 0.0473  |    |                |                |    |                |                | 13 | 12 | 9963.5148  | -0.0032 |    |                |                |    |                |                | 6  | 5  | 10700.8185 | -0.0101 |
|    |                |                |    |                |                | 7  | 6  | 9627.3049 | -0.0169 |    |                |                |    |                |                | 12 | 11 | 9963.5148  | -0.0170 | 7  | 4              | 3              | 6  | 3              | 3              | 7  | 6  | 10702.3992 | 0.0066  |
| 8  | 3              | 6              | 7  | 2              | 5              | 7  | 6  | 9682.805  | 0.0183  | 8  | 3              | 6              | 7  | 2              | 6              | 8  | 7  | 10276.3058 | 0.0068  |    |                |                |    |                |                | 8  | 7  | 10702.5316 | 0.0140  |
|    |                |                |    |                |                | 9  | 8  | 9682.805  | 0.0150  |    |                |                |    |                |                | 7  | 6  | 10276.4794 | -0.0463 |    |                |                |    |                |                | 6  | 5  | 10702.5316 | -0.0086 |
|    |                |                |    |                |                | 8  | 7  | 9682.805  | -0.0580 |    |                |                |    |                |                | 9  | 8  | 10276.4794 | -0.0114 | 7  | 4              | 4              | 6  | 3              | 4              | 7  | 6  | 10722.5339 | -0.0034 |
| 13 | 0              | 13             | 12 | 1              | 12             | 13 | 12 | 9736.0284 | 0.0086  | 9  | 3              | 7              | 8  | 2              | 6              | 10 | 9  | 10277.8736 | -0.0079 |    |                |                |    |                |                | 6  | 5  | 10722.7034 | -0.0043 |
|    |                |                |    |                |                | 12 | 11 | 9736.0284 | 0.0153  |    |                |                |    |                |                | 8  | 7  | 10277.8736 | 0.0000  |    |                |                |    |                |                | 8  | 7  | 10722.7034 | 0.0216  |

| J  | K <sub>a</sub> | K <sub>c</sub> | J'' | K <sub>a</sub> '' | K <sub>c</sub> '' | F' | F'' | Obs        | Res     |
|----|----------------|----------------|-----|-------------------|-------------------|----|-----|------------|---------|
| 7  | 4              | 3              | 6   | 3                 | 4                 | 7  | 6   | 10724.2473 | 0.0002  |
|    |                |                |     |                   |                   | 8  | 7   | 10724.4044 | 0.0112  |
|    |                |                |     |                   |                   | 6  | 5   | 10724.4044 | -0.0149 |
| 14 | 1              | 13             | 13  | 2                 | 12                | 15 | 14  | 10782.2511 | -0.0063 |
|    |                |                |     |                   |                   | 13 | 12  | 10782.2511 | -0.0107 |
|    |                |                |     |                   |                   | 14 | 13  | 10782.2511 | -0.0090 |
| 10 | 3              | 8              | 9   | 2                 | 7                 | 11 | 10  | 10827.9218 | -0.0058 |
|    |                |                |     |                   |                   | 9  | 8   | 10827.9218 | 0.0043  |
|    |                |                |     |                   |                   | 10 | 9   | 10828.0682 | -0.0001 |
| 14 | 2              | 13             | 13  | 1                 | 12                | 13 | 12  | 11148.7226 | 0.0231  |
|    |                |                |     |                   |                   | 15 | 14  | 11148.7226 | 0.0226  |
|    |                |                |     |                   |                   | 14 | 13  | 11148.7226 | -0.0445 |
| 9  | 3              | 7              | 8   | 2                 | 7                 | 9  | 8   | 11190.9487 | 0.0053  |
|    |                |                |     |                   |                   | 8  | 7   | 11191.1503 | -0.0141 |
|    |                |                |     |                   |                   | 10 | 9   | 11191.1503 | 0.0162  |
| 15 | 0              | 15             | 14  | 1                 | 14                | 14 | 13  | 11206.8165 | 0.0279  |
|    |                |                |     |                   |                   | 15 | 14  | 11206.8165 | 0.0214  |
|    |                |                |     |                   |                   | 16 | 15  | 11206.8165 | 0.0327  |
| 10 | 3              | 7              | 9   | 2                 | 7                 | 9  | 8   | 11214.0339 | 0.0000  |
|    |                |                |     |                   |                   | 10 | 9   | 11214.0339 | -0.0061 |
|    |                |                |     |                   |                   | 11 | 10  | 11214.0339 | 0.0030  |
| 15 | 1              | 15             | 14  | 0                 | 14                | 16 | 15  | 11215.5159 | -0.0256 |
|    |                |                |     |                   |                   | 14 | 13  | 11215.5159 | -0.0302 |
|    |                |                |     |                   |                   | 15 | 14  | 11215.5159 | -0.0388 |
| 11 | 3              | 9              | 10  | 2                 | 8                 | 12 | 11  | 11340.1139 | -0.0055 |
|    |                |                |     |                   |                   | 10 | 9   | 11340.1139 | 0.0053  |
|    |                |                |     |                   |                   | 11 | 10  | 11340.2642 | -0.0128 |
| 6  | 5              | 1              | 5   | 4                 | 2                 | 6  | 5   | 11361.8119 | -0.0886 |
|    |                |                |     |                   |                   | 7  | 6   | 11361.998  | -0.0317 |
| 6  | 5              | 2              | 5   | 4                 | 1                 | 6  | 5   | 11361.8119 | 0.0095  |

| J | K <sub>a</sub> | K <sub>c</sub> | J'' | K <sub>a</sub> '' | K <sub>c</sub> '' | F' | F'' | Obs        | Res     |
|---|----------------|----------------|-----|-------------------|-------------------|----|-----|------------|---------|
|   |                |                |     |                   |                   | 7  | 6   | 11361.998  | 0.0666  |
| 9 | 3              | 6              | 8   | 2                 | 7                 | 9  | 8   | 11411.1443 | 0.0111  |
|   |                |                |     |                   |                   | 10 | 9   | 11411.3986 | -0.0201 |
|   |                |                |     |                   |                   | 8  | 7   | 11411.3986 | -0.0611 |
| 8 | 4              | 5              | 7   | 3                 | 4                 | 7  | 6   | 11480.6672 | -0.0020 |
|   |                |                |     |                   |                   | 8  | 7   | 11480.6672 | 0.1029  |
|   |                |                |     |                   |                   | 9  | 8   | 11480.6672 | 0.0142  |
| 8 | 4              | 4              | 7   | 3                 | 4                 | 8  | 7   | 11485.7468 | 0.0984  |
|   |                |                |     |                   |                   | 9  | 8   | 11485.7468 | 0.0059  |
|   |                |                |     |                   |                   | 7  | 6   | 11485.7468 | -0.0108 |
| 8 | 4              | 5              | 7   | 3                 | 5                 | 8  | 7   | 11534.2107 | -0.0048 |
|   |                |                |     |                   |                   | 7  | 6   | 11534.3679 | 0.0031  |
|   |                |                |     |                   |                   | 9  | 8   | 11534.3679 | 0.0250  |
| 8 | 4              | 4              | 7   | 3                 | 5                 | 8  | 7   | 11539.2988 | -0.0007 |
|   |                |                |     |                   |                   | 7  | 6   | 11539.444  | -0.0090 |
|   |                |                |     |                   |                   | 9  | 8   | 11539.444  | 0.0133  |
| 7 | 5              | 3              | 6   | 4                 | 2                 | 7  | 6   | 12167.5539 | -0.0073 |
|   |                |                |     |                   |                   | 6  | 5   | 12167.7064 | -0.0028 |
|   |                |                |     |                   |                   | 8  | 7   | 12167.7064 | 0.0131  |
| 7 | 5              | 2              | 6   | 4                 | 3                 | 7  | 6   | 12168.058  | 0.0033  |
|   |                |                |     |                   |                   | 8  | 7   | 12168.2088 | 0.0214  |
|   |                |                |     |                   |                   | 6  | 5   | 12168.2088 | 0.0052  |
| 9 | 4              | 6              | 8   | 3                 | 5                 | 10 | 9   | 12237.013  | 0.0112  |
|   |                |                |     |                   |                   | 8  | 7   | 12237.013  | 0.0008  |
|   |                |                |     |                   |                   | 9  | 8   | 12237.013  | 0.0625  |
| 9 | 4              | 5              | 8   | 3                 | 6                 | 9  | 8   | 12364.7403 | -0.0109 |
|   |                |                |     |                   |                   | 8  | 7   | 12364.8828 | -0.0102 |
|   |                |                |     |                   |                   | 10 | 9   | 12364.8828 | 0.0090  |
| 6 | 6              | 1              | 5   | 5                 | 0                 | 6  | 5   | 12811.2254 | 0.0551  |
|   |                |                |     |                   |                   | 7  | 6   | 12811.2254 | -0.0044 |

| J  | K <sub>a</sub> | K <sub>c</sub> | J'' | K <sub>a</sub> '' | K <sub>c</sub> '' | F' | F'' | Obs        | Res     |
|----|----------------|----------------|-----|-------------------|-------------------|----|-----|------------|---------|
|    |                |                |     |                   |                   | 5  | 4   | 12811.2254 | 0.0211  |
| 10 | 4              | 7              | 9   | 3                 | 6                 | 10 | 9   | 12958.567  | 0.0050  |
|    |                |                |     |                   |                   | 11 | 10  | 12958.567  | -0.0069 |
|    |                |                |     |                   |                   | 9  | 8   | 12958.567  | -0.0120 |
| 8  | 5              | 4              | 7   | 4                 | 3                 | 8  | 7   | 12971.4809 | -0.0197 |
|    |                |                |     |                   |                   | 7  | 6   | 12971.6259 | -0.0120 |
|    |                |                |     |                   |                   | 7  | 8   | 12971.6259 | -0.0027 |
| 8  | 5              | 3              | 7   | 4                 | 4                 | 8  | 7   | 12973.3001 | -0.0163 |
|    |                |                |     |                   |                   | 7  | 6   | 12973.4476 | -0.0081 |
|    |                |                |     |                   |                   | 7  | 8   | 12973.4476 | 0.0013  |
| 7  | 6              | 2              | 6   | 5                 | 1                 | 6  | 5   | 13618.0266 | -0.0289 |
|    |                |                |     |                   |                   | 8  | 7   | 13618.0266 | -0.0278 |
|    |                |                |     |                   |                   | 7  | 6   | 13618.0266 | 0.0735  |
| 11 | 4              | 8              | 10  | 3                 | 7                 | 11 | 10  | 13633.8258 | -0.0219 |
|    |                |                |     |                   |                   | 10 | 9   | 13633.8258 | 0.0051  |
|    |                |                |     |                   |                   | 12 | 11  | 13633.8258 | 0.0059  |
| 9  | 5              | 5              | 8   | 4                 | 4                 | 9  | 8   | 13772.1031 | -0.0066 |
|    |                |                |     |                   |                   | 8  | 7   | 13772.2234 | -0.0059 |
|    |                |                |     |                   |                   | 10 | 9   | 13772.2234 | 0.0084  |
| 9  | 5              | 4              | 8   | 4                 | 5                 | 9  | 8   | 13777.5442 | -0.0187 |
|    |                |                |     |                   |                   | 10 | 9   | 13777.6812 | 0.0088  |
|    |                |                |     |                   |                   | 8  | 7   | 13777.6812 | -0.0060 |
